1 **An intestinally secreted host factor limits bacterial colonization but promotes microsporidia**  
2 **invasion of *C. elegans***

3

4 Hala Tamim El Jarkass<sup>1</sup>, Calvin Mok<sup>1</sup>, Michael R. Schertzberg<sup>3</sup>, Andrew G. Fraser<sup>1,3</sup>, Emily R.  
5 Troemel<sup>2</sup>, Aaron W. Reinke<sup>1#</sup>.

6

7 <sup>1</sup> Department of Molecular Genetics, University of Toronto, Toronto, ON, Canada.

8 <sup>2</sup> Division of Biological Sciences, University of California, San Diego, La Jolla, California, United  
9 States of America.

10 <sup>3</sup> Donnelly Centre, University of Toronto, Toronto, ON, Canada

11

12 #Corresponding author

13 [aaron.reinke@utoronto.ca](mailto:aaron.reinke@utoronto.ca)

14

15 **Abstract**

16 Microsporidia are ubiquitous obligate intracellular pathogens of animals. These parasites often  
17 infect hosts through an oral route, but little is known about the function of host intestinal proteins  
18 that facilitate microsporidia invasion. To identify such factors necessary for infection by  
19 *Nematocida parisii*, a natural microsporidian pathogen of *Caenorhabditis elegans*, we performed  
20 a forward genetic screen to identify mutant animals that have a Fitness Advantage with  
21 *Nematocida* (Fawn). We isolated four *fawn* mutants that are resistant to *Nematocida* infection and  
22 contain mutations in *T14E8.4*, which we renamed *aaim-1* (Antibacterial and Aids invasion by  
23 Microsporidia). Expression of AAIM-1 in the intestine of *aaim-1* animals restores *N. parisii*

24 infectivity and this rescue of infectivity is dependent upon AAIM-1 secretion. *N. parisii* spores in  
25 *aaim-1* animals are improperly oriented in the intestinal lumen, leading to reduced levels of  
26 parasite invasion. Conversely, *aaim-1* mutants display both increased colonization and  
27 susceptibility to the bacterial pathogen *Pseudomonas aeruginosa* and overexpression of *AAIM-1*  
28 reduces *P. aeruginosa* colonization. Competitive fitness assays show that *aaim-1* mutants are  
29 favoured in the presence of *N. parisii* but disadvantaged on *P. aeruginosa* compared to wild type  
30 animals. Together, this work demonstrates how microsporidia exploits an antibacterial immune  
31 protein to promote host invasion. Our results also highlight the evolutionary trade-offs that exist  
32 to optimizing host defense against multiple classes of pathogens.

33

## 34 **Introduction**

35

36 Microsporidia are a large group of obligate intracellular parasites that infect most types of  
37 animals.<sup>1</sup> These ubiquitous parasites possess the smallest known eukaryotic genome size, and are  
38 extremely reliant on their host as a result of the loss of many genes involved in metabolism and  
39 energy production.<sup>2,3</sup> Microsporidia can have a large impact on the evolution of their hosts, as  
40 infection with microsporidia often leads to a reduction in host offspring and the effect of this  
41 selective pressure has resulted in resistant animals within a population.<sup>4,5</sup> Microsporidia are  
42 currently a major threat to many commercially important species such as honeybees and shrimp.<sup>6,7</sup>  
43 Many species also infect humans and infections in immunocompromised individuals can result in  
44 lethality.<sup>8</sup> Despite their ubiquitous nature, effective treatment strategies are currently lacking for  
45 these poorly understood parasites.<sup>9</sup>

46

47 Microsporidia infection begins with invasion of host cells. They possess the most fascinating  
48 invasion machinery, a unique structure known as the polar tube.<sup>10</sup> This apparatus, resembling a  
49 long thread, is often coiled within a dormant spore. However, once inside of a host, and in  
50 proximity to the tissue of interest, the polar tube rapidly emerges or “fires” , releasing its the  
51 parasites infectious material (the sporoplasm) which is deposited intracellularly either through  
52 direct injection, or through the internalization of the sporoplasm.<sup>10,11</sup>

53  
54 A number of microsporidia proteins have been demonstrated to play important roles during  
55 invasion by insect- and human-infecting species of microsporidia.<sup>10</sup> For example, spore wall  
56 proteins can interact with host cells through the recognition of sulfated glycosaminoglycans,  
57 heparin binding motifs, integrins, and proteins on the cell surface.<sup>12-17</sup> In *Encephalitozoon* species  
58 polar tube proteins (PTP) can mediate interactions with the host. For instance, O-linked  
59 mannosylation on PTP1 has been demonstrated to bind mannose binding receptors, whereas PTP4  
60 interacts with the transferrin receptor (Trf1).<sup>11,18-20</sup> Additionally, the sporoplasm surface protein,  
61 EhSSP1, binds to an unknown receptor on the cell surface.<sup>21</sup> These proteins on the spore, polar  
62 tube, and sporoplasm have all been shown to promote microsporidia adhesion or invasion of host  
63 cells in culture systems, but the role of these proteins during animal infection is unclear.

64  
65 The nematode *Caenorhabditis elegans* is infected in its natural habitat by several species of  
66 microsporidia, and frequently by *Nematocida parisii*.<sup>22-24</sup> This species infects the intestinal cells  
67 of *C. elegans*, which possess extreme similarity to those of mammalian cells, making it both a  
68 relevant tissue and model to study these infections in vivo.<sup>24,25</sup> Infection of *C. elegans* by *N. parisii*  
69 begins when spores are consumed by the worm, where they then pass through the pharynx into the

70 intestinal lumen and fire, depositing sporoplasms inside of intestinal cells. Within 72 hours the  
71 sporoplasm will divide into meronts, which differentiate into spores, that then exit the animal,  
72 completing the parasite's life cycle.<sup>26,27</sup> Infection with *N. parisii* leads to reduced fecundity and  
73 premature mortality<sup>24,26</sup> Several mutants have been shown to affect proliferation and spore exit.<sup>28,29</sup>  
74 Immunity that can either prevent infection or clear the pathogen once infected have also been  
75 described.<sup>4,27,30-32</sup> In contrast, very little is known about how *N. parisii* invades *C. elegans*  
76 intestinal cells. Almost all of the microsporidia proteins known to facilitate invasion are not  
77 conserved in *N. parisii* and although host invasion factors described in other species are present in  
78 *C. elegans*, there is no evidence that they are being used by microsporidia during invasion of *C.*  
79 *elegans*.<sup>11</sup>

80  
81 To understand how microsporidia invade animal cells, we performed a forward genetic screen to  
82 identify host factors that promote infection. We identified a novel, nematode-specific protein,  
83 AAIM-1, whose loss of function confers resistance to microsporidia infection. This protein is  
84 expressed in intestinal cells, secreted into the intestinal lumen, and is necessary to ensure proper  
85 spore orientation during intestinal cell invasion. In addition, we show that AAIM-1 limits bacterial  
86 colonization of pathogenic *Pseudomonas aeruginosa*. Strikingly, T14E8.4 plays opposing roles on  
87 host fitness in the face of pathogenesis. The utilization of a host factor critical for bacterial defense  
88 reflects a clever strategy to ensuring microsporidia's reproductive success.

89

## 90 **Results**

91 **A forward genetic screen identifies *aaim-1* as being necessary for *N. parisii* infection.**

92 To identify host factors needed for infection by microsporidia, we carried out a forward genetic  
93 screen using a *C. elegans* model of *N. parisii* infection. We took advantage of the previously  
94 described phenotypes of *C. elegans* displaying reduced fitness when infected with *N. parisii*,  
95 including lower progeny production and stunted development.<sup>26,27,33</sup> We mutagenized animals and  
96 subjected F2 progeny to *N. parisii* infection. After infecting populations for five subsequent  
97 generations, we selected individual worms containing embryos, indicating increased fitness in the  
98 presence of infection (see Methods). We identified four independent isolates that reproducibly had  
99 higher fractions of animals containing embryos compared to wild type (N2). We named these  
100 isolates Fitness Advantage With *Nematocida* (*fawn* 1-4) (Figure S1a).

101  
102 We first determined if these *fawn* mutants were also resistant to *N. parisii* infection. We grew the  
103 three isolates with the strongest phenotype, *fawn* 1-3, in the presence and absence of *N. parisii*,  
104 and stained each population of worms with the chitin binding dye, Direct-yellow 96 (DY96), at 72  
105 hours post infection (hpi). DY96 allows for the visualization of chitinous microsporidia spores as  
106 well as worm embryos (Figure 1a). In the absence of infection, there is no difference in the fraction  
107 of *fawn-2* and *fawn-3* animals developing into adults containing embryos (gravid adults), although  
108 *fawn-1* has a modest defect. In comparison, all three *fawn* isolates generate significantly more  
109 gravid adults than N2 animals in the presence of infection (Figure 1b). We next examined the  
110 fraction of animals in each strain containing intracellular microsporidia spores and observed that  
111 all three *fawn* isolates display significantly fewer numbers of spore-containing worms (Figure 1c).  
112 These results suggest that *fawn* mutants are missing an important factor for efficient microsporidia  
113 infection.

114

115 To identify the causal mutations underlying the Fawn phenotype, we used a combination of whole-  
116 genome sequencing and genetic mapping. We generated F2 recombinants and performed two  
117 rounds of infection with microsporidia, selecting for gravid animals. After each round we used  
118 molecular inversion probes to determine the region of the genome linked to the causal mutation.<sup>34</sup>  
119 This revealed strong signatures of selection on the left arm of chromosome X in all three *fawn*  
120 isolates absent in N2 (Figure S1b). Analysis of whole genome sequencing showed that all four  
121 *fawn* isolates contained different alleles of *T14E8.4*, which we named *aaim-1* (Antibacterial and  
122 Aids Invasion by Microsporidia-1) for reasons described below (Figure 1d). We validated the role  
123 of *aaim-1* in resistance to infection using several additional alleles: an independent allele RB563  
124 (*ok295*), carrying a large gene deletion in both *aaim-1* and *dop-3*, and a CRISPR-Cas9 derived  
125 allele, *aaim-1 (kea22)*, that contains a large gene deletion. Both of these alleles displayed a fitness  
126 advantage when infected with *N. parisii* (Figure 1d,e, S1c,d). These data demonstrate that *aaim-1*  
127 is the causative gene underlying the *fawn* 1-4 infection phenotypes. In subsequent experiments we  
128 utilized both *aaim-1 (kea22)*, and *fawn-3 (kea28)*, carrying a 2.2 kb deletion in *aaim-1*, which was  
129 outcrossed to N2 six times.

130

131 ***aaim-1* is expressed in the pharynx and intestine, and secretion is important for function.**

132 AAIM-1 is a poorly characterized protein that does not possess any known or conserved domains.  
133 Homologs of the protein exist in both free-living and parasitic nematodes (Figure S2). To further  
134 characterize the role of AAIM-1 during *N. parisii* infection, we generated transgenic  
135 extrachromosomal lines of *C. elegans* carrying a reporter strain of GFP under control of the *aaim-*  
136 *1* promoter. GFP fluorescence was observed in the terminal bulb of the pharynx as well as the

137 posterior of the intestine throughout development (Figure 2a). Embryos and L1 animals display  
138 additional expression in the arcade cells of the pharynx (Figure 2a, S3a).

139

140 The first 17 amino acids of AAIM-1 are predicted to encode a signal peptide.<sup>35</sup> This suggests that  
141 AAIM-1 may be secreted into the pharyngeal and intestinal lumen, the extracellular space through  
142 which *N. parisii* spores pass before invading intestinal cells. To test where AAIM-1 functions in  
143 and if secretion is important for function, we generated a series of transgenic worms expressing  
144 extrachromosomal arrays (Supplemental table 1). First, we generated transgenic *aaim-1 (kea22)*  
145 animals expressing AAIM-1 tagged on the C-terminus with a 3x Flag epitope. Transgenic animals  
146 expressing AAIM-1 under its native promoter complement the ability of *aaim-1 (kea22)* animals  
147 to develop into adults in the presence of a high amount of *N. parisii* spores (Figure 2b). A construct  
148 expressing GFP or GFP::3xFlag does not influence this phenotype nor does the presence of the  
149 epitope tag impair the ability of AAIM-1 to rescue the mutant phenotype (Figure S3b). We next  
150 generated a signal peptide mutant allele of AAIM-1 missing the first 17 amino acids (*SPΔaaim-*  
151 *1*), which is unable to complement the *aaim-1 N. parisii* infection phenotype. In contrast, AAIM-  
152 1 expressed from an intestinal specific promoter can rescue the infection phenotype of *aaim-1*  
153 (*kea22*) (Figure 2b).

154

155 To determine where AAIM-1 localizes, we dissected the intestines from transgenic worms and  
156 performed immunofluorescence using anti-Flag antibodies. We were unable to detect expression  
157 of AAIM-1::3xFlag when expressed from its endogenous promoter. However, we observed protein  
158 expression in the intestinal cells of animals expressing AAIM-1::3xFlag from a strong, intestinal  
159 specific promoter or when the signal peptide was removed (Figure 2c).<sup>36</sup> We did not observe

160 AAIM-1::3xFlag localized in the extracellular space of the intestinal lumen, possibly due to rapid  
161 turnover of intestinal contents or due to loss from dissection of the intestines.<sup>37</sup> The increased  
162 expression in the signal peptide mutant suggests an accumulation of protein that is unable to be  
163 secreted. Taken together, these data demonstrate that AAIM-1 is secreted and acts within the  
164 intestinal lumen to promote *N. parisii* infection.

165

166 **AAIM-1 is only necessary for microsporidia infection at the earliest larval stage.**

167 *N. parisii* infection of *C. elegans* can occur throughout development, but several forms of  
168 immunity towards microsporidia have been shown to be developmentally regulated.<sup>4,27</sup> To  
169 determine if *aaim-1* mutant animals display developmentally restricted resistance to infection, we  
170 infected *fawn* 1-3 at the L1 and L3 stage. For these experiments we took advantage of another  
171 intestinal-infecting species of microsporidia, *Nematocida ausubeli*, which has a more severe effect  
172 on *C. elegans* fecundity, allowing us to determine fitness defects after the L1 stage.<sup>4,23,26</sup> *fawn*  
173 isolates are resistant to *N. ausubeli* as seen by an increase in the fraction of gravid adults in the  
174 population after exposure to a medium dose of *N. ausubeli* (Figure 3a). When we initiated  
175 infections at the L3 stage of growth, *fawn* isolates do not have increased resistance, and instead  
176 exhibit wild type levels of susceptibility (Figure 3b). To rule out the possibility that this L1  
177 restricted phenotype was the result of exposure to sodium hypochlorite treatment, used to  
178 synchronize worms, we exposed embryos that were naturally laid by adults within a two-hour  
179 window to *N. parisii* infection. Animals synchronized in this manner still display a robust resistance  
180 to *N. parisii* (Figure S4c). Thus, resistance to infection in *aaim-1* mutants is developmentally  
181 restricted and AAIM-1 is utilized by multiple different species of microsporidia.

182



183 **AAIM-1 is needed for efficient invasion of intestinal cells**

184 Resistance to infection could be the result of a block in invasion, proliferation, or through the  
185 destruction of the parasite. To test the mechanism of resistance in *aaim-1* mutants, we performed  
186 pulse-chase infection assays at the L1 and L3 stage of development.<sup>4,27</sup> Here, we treated animals  
187 with a medium-1 dose of *N. parisii* for 3 hours, washed away any un-ingested spores, and then  
188 replated the animals in the absence of spores for an additional 21 hours. We then used an 18S RNA  
189 FISH probe to detect *N. parisii* sporoplasms, which is the earliest stage of microsporidia invasion.  
190 In our *fawn* 1-3 isolates we detect less invasion at 3hpi compared to N2 (Figure S4a). However,  
191 there was no reduction in the number of infected animals between 3hpi and 21 hpi, indicating that  
192 pathogen clearance was not occurring. This defect in invasion was not present at the L3 stage,  
193 providing further support that resistance is restricted to the L1 stage in *aaim-1* mutants (Figure  
194 S4b). A reduction in invasion could be due to a feeding defect, leading to a reduction in spore  
195 consumption. To test rates of consumption, we measured the intestinal accumulation of fluorescent  
196 beads. We find that *aaim-1* alleles displayed wild-type levels of bead accumulation, unlike the  
197 feeding defective strain *eat-2 (ad465)* (Figure S4d).

198

199 For *N. parisii* to invade host cells, spores must first enter the intestinal lumen and fire their polar  
200 tube.<sup>27</sup> To test if *aaim-1* mutants have defects in spore entry or spore firing, we infected animals  
201 for either 45 minutes or 3 hours, at the L1 and L3 stages. We then fixed and stained animals with  
202 both *N. parisii* 18S RNA FISH probe and DY96 and quantified the number of spores present in  
203 the intestinal lumen of animals. Here, *aaim-1* animals infected for 45 minutes or 3 hours at L1 or  
204 L3 contained similar amounts of spores as N2 animals (Figure 3 c,f, S5a,d). The percentage of  
205 fired spores present within these animals is also not significantly different at either developmental

206 stage (Figure 3d,g, S5b,e). We then counted the number of sporoplasms per animal and observed  
207 significantly fewer invasion events in *aaim-1* mutant animals infected at L1 (Figure 3e, S5c). In  
208 contrast the number of sporoplasms in L3 stage *aaim-1* alleles are similar to that observed in the  
209 N2 strain (Figure 3h, S5f). These results demonstrate that the *N. parisii* invasion defect in *aaim-1*  
210 mutants is not caused by differences in spore firing or accumulation. Instead, these results suggest  
211 that spores are misfiring, leading to unsuccessful invasion.

212

### 213 **AAIM-1 plays a role in promoting proper spore orientation**

214 To determine how AAIM-1 promotes *N. parisii* invasion, we further examined the invasion  
215 process. We pre-stained spores with Calcofluor white (CFW) and assessed their orientation relative  
216 to the intestinal apical membrane in L1 worms infected for 45 minutes (Figure 4a). In N2 animals,  
217 32.4% of spores are angled relative to the apical membrane. In contrast, spores in *aaim-1* alleles  
218 were angled 14.3% of the time (Figure 4b). Other host factors that promote microsporidia invasion  
219 cause adherence to host cells.<sup>11</sup> To determine if AAIM-1 influences the location of spores relative  
220 to intestinal cells in *aaim-1* mutants, we measured the perpendicular distance from the center of a  
221 parallel spore to the apical membrane of the intestine. Surprisingly, parallel spores in *aaim-1*  
222 alleles were significantly closer to the apical membrane (0.29  $\mu\text{m}$ ) than those in N2 (0.34  $\mu\text{m}$ )  
223 (Figure 4c). In agreement with resistance being developmentally restricted, *aaim-1* mutants display  
224 wild-type spore orientations and distances from the membrane when infections were initiated at  
225 L3 (Figure 4d,e). The width of the intestinal lumen at L1 does not differ significantly between N2  
226 and *aaim-1* mutants, however, L3 animals generally possess wider intestinal lumens (Figure  
227 S5g,h). Thus, taken together these results suggest that AAIM-1 plays a distinct role in the intestinal

228 lumen at L1 to promote proper spore orientation, through maintaining an appropriate distance and  
229 angle to the apical membrane, resulting in successful invasion.

230

### 231 ***AAIM-1* inhibits intestinal colonization by *Pseudomonas aeruginosa***

232 Interestingly, *aaim-1* has been shown to be upregulated by a variety of different fungal and  
233 bacterial pathogens, including *P. aeruginosa*.<sup>38,39</sup> Using our transcriptional reporter strain, we  
234 sought to confirm this and determine if microsporidia infection could also induce *aaim-1*  
235 transcription. N2 animals carrying a transcriptional reporter (*paaim-1::GFP::3xFlag*) were exposed  
236 to *N. parisii*, *P. aeruginosa* PA14, or *E. coli* OP50, and the levels of GFP quantified when grown  
237 on these pathogens for 72 hours from the L1 stage, or for 24 hours from the L4 stage. Infection by  
238 either *N. parisii* or *P. aeruginosa* PA14 resulted in the upregulation of *aaim-1* as detected by an  
239 increase in the GFP signal (Figure 5a, S6e).

240

241 Previously, an *aaim-1* deletion strain, RB563 (*ok295*), was shown to display reduced survival on  
242 lawns of *P. aeruginosa* PA14.<sup>40</sup> The enhanced susceptibility previously reported was attributed to  
243 *dop-3*, which is also partially deleted in RB563 (*ok295*).<sup>40</sup> To determine if *aaim-1* mutants are  
244 susceptible to pathogenic bacterial infection, we assayed the survival of L4 stage worms in *P.*  
245 *aeruginosa* PA14 slow killing assays was quantified. Here, *aaim-1* alleles displayed reduced  
246 survival compared to N2, indicating that *aaim-1* mutants have enhanced susceptibility to PA14  
247 (Figure 5b, S6a,b).

248

249 Lethality in slow killing assays is a result of *P. aeruginosa* accumulation within the intestinal  
250 lumen.<sup>41,42</sup> To investigate if *aaim-1* alleles displayed higher levels of bacterial burden, animals

251 grown on lawns of PA14::DsRed at the L1 or L4 stage for 48 hours. *aaim-1* mutant alleles grown  
252 on lawns of PA14::DsRed as L4s, but not L1s, displayed higher bacterial burden relative to N2  
253 (Figure 5c, S6c,d). To test if intestinal expression of *aaim-1* was sufficient to limit bacterial  
254 colonization, transgenic *aaim-1* (*kea22*) overexpressing AAIM-1::3xFlag from the endogenous or  
255 an intestinal specific (*spp-5*) promoter were exposed to lawns of PA14::DsRed. When grown for  
256 48 hours at the L1 or L4 stage, bacterial burden was significantly reduced, relative to N2 (Figure  
257 5d, e). The results indicate that AAIM-1 plays a role in limiting bacterial colonization, and its loss  
258 results in reduced survival due to hyper-colonization of the intestinal lumen.

259

## 260 **Fitness of *aaim-1* animals is dependent upon microbial environment**

261 To investigate how *aaim-1* alleles can influence population structure, we set up competitive fitness  
262 assays. A *C. elegans* strain with a fluorescent marker (RFP::ZNFX1) was co-plated with N2 or  
263 *aaim-1* mutants on *E. coli* OP50, *N. parisii* or *P. aeruginosa* PA14. Animals were grown for 8  
264 days, such that the population was composed of adult F1s and developing F2s. On *E. coli* OP50,  
265 there is equal representation of N2 and *aaim-1* mutants in the population (Figure 6a). This is  
266 consistent with *aaim-1* mutants not having a developmental delay (Figure 1b) or a decrease in  
267 longevity (Figure S7). In contrast, growth on *N. parisii* resulted in *aaim-1* alleles outcompeting  
268 the N2 strain. Conversely, *aaim-1* mutants on *P. aeruginosa* PA14 did significantly worse, being  
269 underrepresented in the population compared to N2 (Figure 6a). Interestingly, wild isolates of *C.*  
270 *elegans* do not carry any obvious loss of function alleles of *aaim-1* suggesting that natural  
271 conditions have selected for its retention (Figure S8).<sup>43</sup>

272

273 Given the opposing fates of *aaim-1* mutants on *N. parisii* and *P. aeruginosa*, we investigated the  
274 effects of co-infection. Animals were infected with a maximal dose of *N. parisii* for 3 hours, prior  
275 to placement on lawns of PA14. For infections with a single pathogen, we observed similar results  
276 as before whereby *aaim-1* mutants have increased fitness in the presence of *N. parisii* and display  
277 lower levels of parasite burden but have increased bacterial accumulation when grown on PA14.  
278 In the presence of both pathogens, populations of *aaim-1* mutants display fewer gravid adults and  
279 increased amounts of *N. parisii* spores. (Figure 6b,c). These results suggests that coinfection with  
280 *N. parisii* and *P. aeruginosa* has synergistically negative effects on the fitness of *C. elegans*.

281

## 282 **Discussion:**

283 To identify host factors needed for microsporidia infection, we isolated mutants from a forward  
284 genetic screen that have a fitness advantage when challenged with *N. parisii* infection. This screen  
285 identified mutants in the poorly understood protein AAIM-1 (previously T14E8.4). Here, we  
286 demonstrate that this protein both promotes microsporidia invasion and limits colonization by  
287 pathogenic bacteria. Although we were unable to visualize the localization of secreted AAIM-1,  
288 our genetic and infection experiments strongly suggest that this protein acts in the intestinal lumen  
289 where both microsporidia invasion and bacterial colonization both take place. The key role that  
290 AAIM-1 plays in immunity is further exemplified by its transcriptional regulation in response to  
291 infection (Figure 7).

292

293 The processes by which microsporidia invade host cells are poorly understood. We show that *N.*  
294 *parisii* spores are often angled in wild-type *C. elegans*, suggesting that successful invasion requires  
295 a particular spore orientation. In the absence of AAIM-1, spores are more often parallel to the

296 intestinal lumen, where spores may fire without the successful deposition of the sporoplasm inside  
297 an intestinal cell. In contrast to previously described host and microsporidia proteins involved in  
298 invasion, AAIM-1 does not appear to be involved in promoting adhesion to the surface of host  
299 cells.<sup>10,11</sup> Instead, AAIM-1 ensures an adequate distance of spores from the intestinal membrane,  
300 possibly allowing spores to be able to properly orient themselves to ensure proper host cell  
301 invasion. *N. parisii* spores are ~2.2  $\mu\text{m}$  long by ~0.8  $\mu\text{m}$  wide and the average width of the  
302 intestinal lumen at the L1 stage is ~0.6  $\mu\text{m}$ <sup>23</sup>. Therefore, at the L1 stage spores may not be able to  
303 move freely, but at the L3 stage, where AAIM-1 is not needed for invasion, there is less of a  
304 constraint on spore movement as the luminal width increases to ~1.3  $\mu\text{m}$ . Together, our results  
305 highlight the power of studying microsporidia invasion in the context of a whole animal model.

306  
307 *C. elegans* employs a variety of proteins to protect against bacterial infection. Many of these  
308 proteins belong to several classes of antimicrobial effectors used to eliminate and prevent  
309 colonization by pathogenic bacteria<sup>44</sup>, are upregulated upon infection and predicted to be  
310 secreted.<sup>45,46</sup> One class of secreted proteins that are known to have immune functions and prevent  
311 bacterial adherence are the mucins. These large, glycosylated secreted proteins are upregulated  
312 during *C. elegans* infection and their knockdown alters susceptibility to *P. aeruginosa* infection.  
313<sup>47,48</sup> AAIM-1 has many predicted mucin-like O-glycosylation sites on serine and threonine  
314 residues.<sup>49-51</sup> Thus one possibility is that AAIM-1 may be functionally analogous to mucins,  
315 preventing the adhesion of microbes to the surface of intestinal cells. As AAIM-1 does not contain  
316 any known or conserved domains and further work will be necessary to determine its exact  
317 biochemical function.

318

319 *C. elegans* lives in a microbially dense environment containing a wide variety pathogens that *C.*  
320 *elegans* has evolved immunity towards.<sup>23,52–55</sup> Although loss of *aaim-1* provides a fitness  
321 advantage to *C. elegans* when grown in the presence of microsporidia, obvious loss of function  
322 alleles are not present in wild isolates sequenced thus far. Additionally, *aaim-1* mutants do not  
323 have observable defects when grown on non-pathogenic *E. coli*. This is in contrast to mutations in  
324 *pals-22* or *lin-35*, which negatively regulate the transcriptional response to infection and provide  
325 resistance to microsporidia infection when mutated, but at the cost of reduced reproductive  
326 fitness<sup>27,56</sup>. Loss of *aaim-1* disadvantages *C. elegans* when grown on *P. aeruginosa*, demonstrating  
327 that there is a trade-off in host defense between microsporidia and pathogenic bacteria. The  
328 opposing functions of *aaim-1* with different pathogens adds to the limited set of known examples  
329 of trade-offs that constrain the evolution of host defense to multiple biotic threats<sup>57,58</sup>

330

## 331 **Methods**

332

### 333 **Strain maintenance**

334 *C. elegans* strains were grown at 21°C on nematode growth media (NGM) plates seeded with 10x  
335 saturated *Escherichia coli* OP50-1.<sup>27</sup> Strains used in this study are listed in Supplemental table 1.  
336 For all infection assays, 15-20 L4 staged animals were picked onto 10cm seeded NGM plates 4  
337 days prior to sodium hypochlorite/1M NaOH treatment. After 4 days, heavily populated non-starved  
338 plates were washed off with 1ml M9, treated twice with 1 ml of sodium hypochlorite/1M NaOH  
339 solution, and washed three times in 1 ml M9. Embryos were then resuspended in 5 ml of M9 and  
340 left to rock overnight at 21°C. L1's were used in subsequent experiments no later than 20 hours

341 after bleach treatment. All centrifugation steps with live animals/embryos were performed in  
342 microcentrifuge tubes at 845xg for 30s.

343  
344 Throughout the paper, L1 refers to the stage immediately post hatching or bleach synchronization,  
345 L3 refers to 24 hours and L4 refers to 48 hours post plating of bleach synchronized L1's at 21°C.  
346 L3 and L4 animals were washed off plates in M9 + 0.1% Tween-20, followed by an additional  
347 wash to remove residual bacteria before infection with microsporidia, or plating on PA14.

348

### 349 **Forward Genetic Screen**

350 6,000 L4 N2 hermaphrodites were mutagenized with a combination of 50 mM EMS and 85.4 mM  
351 ENU for 4 hours to achieve a large diversity of mutations within the genome.<sup>59</sup> P0 animals were  
352 then split and placed onto 48 10cm NGM plates, F1s bleached and resulting F2s pooled onto 5  
353 separate plates. 180,000 L1 F2 animals were plated onto a 10 cm plate with 10 million *N. parisii*  
354 spores and 1 ml 10x saturated OP50-1. Animals were grown for 72 hours, to select for animals  
355 that display a fitness advantage phenotype with respect to N2. Each population was bleached and  
356 grown in the absence of infection for one generation, in order to prevent the effects of  
357 intergenerational immunity<sup>27</sup>. Two more cycles of infection followed by growing worms in the  
358 absence of infection was performed. Populations of bleached L1s were then infected with either  
359 20 or 40 million spores and grown for 76 hours. Worms were then washed into 1.5 ml tube and 1  
360 ml of stain solution (1x PBS/0.1% Tween-20/2.5 mg/ml DY96/1% SDS) was added. Samples were  
361 incubated with rotation for 3.5 hours and then washed 3 times with M9 + 0.1% Tween-20.  
362 Individual worms that had embryos, but not spores, were picked to individual plates. Each of the  
363 four *fawn* strains was isolated from a different mutant pool.



364

### 365 **Whole genome sequencing**

366 N2 and *fawn* isolates were each grown on a 10 cm plate until all *E. coli* was consumed. Each worm  
367 was washed off with M9 and frozen at -80°C. DNA was extracted using Gentra puregene Tissue  
368 Kit (QIAGEN). Samples were sequenced on an Illumina HiSeq 4000, using 100 base paired end  
369 reads.

370

### 371 **MIP-Map**

372 Molecular inversion probes were used to map the underlying causal mutations in *fawn* isolates as  
373 previously described.<sup>34</sup> Briefly, *fawn* hermaphrodites were crossed to males of the mapping strain  
374 DM7448 (VC20019 Ex[*pmyo3::YFP*]) hereafter referred to as VC20019. Next, 20 F1  
375 hermaphrodite cross progeny, identified as those carrying *pmyo3::YFP* were isolated and allowed  
376 to self. F2s were then bleached, and 2,500 L1s were exposed to a medium-2 dose of *N. parisii*  
377 spores representing the first round of selection. Two plates of 2,500 F3 L1s were set up. The  
378 experimental plate was grown in the absence of infection for one generation, to negate  
379 intergenerational immunity.<sup>27</sup> A second plate of 2,500 L1s was allowed to grow to 72 hours and  
380 then frozen in H<sub>2</sub>O at -80°C, until used for genomic preparation. The selection and rest steps were  
381 repeated once more, and a second frozen sample of worms was taken at the end of the mapping  
382 experiment. This process was also performed for a cross between N2 hermaphrodites and males  
383 of the mapping strain VC20019, as a negative control to identify non-causal loci that may be  
384 selected for reasons other than resistance to infection. Two genomic preparations, corresponding  
385 to the two rounds of selection, were used as template for MIP capture, to generate multiplexed  
386 libraries for sequencing. An Illumina Mini-seq was used to generate sequencing data that was

387 subjected to demultiplexing via R, and selection intervals were defined as those immediately  
388 adjacent to the region on the chromosome carrying the fewest proportion of reads corresponding  
389 to the mapping strain, VC20019. This interval was then used to scan for putative causal alleles,  
390 resulting in the identification of the four *aaim-1* alleles in the four *fawn* isolates.

391

### 392 **Identification of causal gene**

393 Variants were identified using a BWA-GATK pipeline. Briefly, sequencing reads were checked  
394 for sequence quality using FastQC (<http://www.bioinformatics.babraham.ac.uk/projects/fastqc/>)  
395 and bases lower than a quality threshold of 30 were trimmed off with Trimmomatic using a sliding  
396 window of 4 bases and minimum length of 36 bases.<sup>60</sup> Reads were aligned to the *C. elegans* N2  
397 reference genome (release W220) using BWA-mem.<sup>61</sup> Alignments were sorted by coordinate order  
398 and duplicate reads removed using Picard (<https://github.com/broadinstitute/picard>). Prior to  
399 variant calling, reads were processed in Genome Analysis Tool Kit (GATK) v3.8.1,<sup>62</sup> to perform  
400 indel realignment and base quality score recalibration using known *C. elegans* variants from  
401 dbSNP, build 138 (<http://www.ncbi.nlm.nih.gov/SNP/>). GATK HaplotypeCaller was used to call  
402 variants, and results were filtered for a phred-scaled Qscore > 30 and to remove common variants  
403 found previously in multiple independent studies. Finally, Annovar<sup>63</sup> was used to obtain a list of  
404 annotated exonic variants for each sequenced strain.

405

### 406 **Microsporidia infection assays**

407 *N. parisii* (ERTm1) spores were prepared as described previously.<sup>27</sup> All infections were carried  
408 out on 6-cm NGM plates, unless otherwise specified by spore dose (see Supplemental table 2), or  
409 experimental method. 1,000 bleach-synchronized L1s were added into a microcentrifuge tube

410 containing 400  $\mu$ l of 10X *E. coli* OP50, and spores. After pipetting up and down, this mixture was  
411 top plated onto an unseeded 6-cm NGM plate, and left to dry in a clean cabinet, prior to incubation  
412 at 21°C for 72 hours. Infections set up on 3.5-cm plates used 160  $\mu$ l of 10x *E. coli* OP50 and 400  
413 L1's.

414

#### 415 **Infection of embryos hatched on plates**

416 Twenty-five 72-hour old synchronized animals of each strain were picked onto 3.5-cm unseeded  
417 NGM plates seeded with 16  $\mu$ l of 10x *E. coli* OP50. Plates were incubated at 21°C for two hours.  
418 Adults were then picked off, and a mixture of 144  $\mu$ l of 10x *E. coli* OP50 and a low dose of *N.*  
419 *parisii* spores were added to each plate. Animals were fixed and stained after 72 hours.

420

#### 421 **Pulse-chase infection assay**

422 6,000 bleach synchronized animals were exposed to a medium-1 (Figure S4) or medium-3 (Figure  
423 3) dose of spores, 10  $\mu$ l of 10x *E. coli* OP50 in a total volume of 400  $\mu$ l made up with M9. To  
424 assay pathogen clearance 3 hpi, animals were washed off in 1 ml M9 + 0.1% Tween-20, and split  
425 into two populations. The first was fixed with acetone to represent initial infectious load, while the  
426 other half was washed twice in M9 + 0.1% Tween-20 to remove residual spores in the supernatant  
427 and prevent additional infection from occurring. These washed worms were then plated on 6-cm  
428 unseeded NGM plates with 40  $\mu$ l 10x OP50, and 360  $\mu$ l M9 and left to incubate at 21°C for 21  
429 additional hours before fixation.

430

#### 431 **Spore localization and firing assays**

432 Strains were infected as described for the pulse infection assays for either 45 minutes or 3 hours.  
433 Animals were then washed off plates, fixed, and stained with DY96 and *N. parisii* 18S RNA FISH  
434 probe. FISH<sup>+</sup> DY96<sup>+</sup> events represent unfired spores, FISH<sup>-</sup> DY96<sup>+</sup> events represent fired spores  
435 and FISH<sup>+</sup> DY96<sup>-</sup> events represent sporoplasms. Percentage of fired spores is defined as the  
436 number of FISH<sup>-</sup> DY96<sup>+</sup> events over the total number of spores.

437

438 To assess spore orientation, the localization of spores relative to the apical membrane of the apical  
439 intestine was measured in live anaesthetized animals. To determine if a spore was angled, straight  
440 lines were extended from both ends of the spore independently. If either of these two lines crossed  
441 the apical membrane, a spore was considered angled. If not, the spore was considered parallel.  
442 Distance of spores from the apical membrane was assessed by measuring perpendicular distance  
443 from the central edge of a parallel spore to the apical membrane. All measurements were  
444 performed on FIJI<sup>64</sup> using the angle tool or the straight line tool respectively, followed by the  
445 Analyze → measure option.

446

#### 447 **Intestinal lumen measurements**

448 Measurements were performed on live anaesthetized worms used for spore localization assays (see  
449 above). The width of the lumen was determined by extending a straight line from the apical  
450 membrane on one end of the worm to that directly across on the other end, at the midpoint of the  
451 intestine, and the distance measured in FIJI, via the straight line tool followed by the Analyze →  
452 measure option.

453

#### 454 **Fixation**

455 Worms were washed off infection plates with 700  $\mu$ l M9 +0.1% Tween-20 and washed once in  
456 1ml M9+0.1%Tween-20. All microsporidia infected samples were fixed in 700  $\mu$ l of acetone for  
457 2 minutes at room temperature prior to staining. All *P. aeruginosa* PA14::DsRed infected samples  
458 were fixed in 500  $\mu$ l of 4% paraformaldehyde (PFA) for 30 minutes at room temperature prior to  
459 mounting on slides.

460

#### 461 **Live imaging**

462 Animals were mounted on 2% Agarose pads in 10  $\mu$ l of 25mM Sodium Azide. This technique was  
463 used for spore localization assays, transcriptional reporter imaging, and assessing PA14::DsRed  
464 colonization in transgenic animals.

465

#### 466 **Chitin Staining**

467 The chitin binding dye Direct yellow 96 (DY96) was used to assess host fitness (gravidity) as  
468 well as parasite burden. 500  $\mu$ l of DY96 solution (1 x PBST, 0.1% SDS, 20  $\mu$ g/ml DY96) was  
469 added to washed worm pellets and left to rock for 20-30 minutes at room temperature. Worms  
470 were then resuspended in 20  $\mu$ l of EverBrite™ Mounting Medium (Biotium), and 10  $\mu$ l mounted  
471 on glass slides for imaging.

472

473 To prestain spores prior to infection, 0.5  $\mu$ l of Calcofluor white solution (CFW) (Sigma- Aldrich  
474 18909) was added per 50  $\mu$ l of spores, pipetted up and down gently and left for 2 minutes at room  
475 temperature prior to infection.

476

#### 477 **Fluorescence in Situ hybridization-FISH**

478 To quantify the number of sporoplasms in *N. parisii* infected animals, the MicroB FISH probe  
479 (ctctcggaactccttctg) labelling *N. parisii* 18S RNA was used. Animals were fixed in acetone,  
480 washed twice in 1 ml PBST, and once in 1 ml of hybridization buffer (0.01% SDS, 900 mM NaCl,  
481 20 mM TRIS pH 8.0). Samples were then incubated overnight in the dark at 46 °C with 100 µl of  
482 hybridization buffer containing 5 ng/µl of the MicroB FISH probe conjugated to Cal Fluor 610  
483 (LGC Biosearch Technologies). Samples were then washed in 1ml of wash buffer (Hybridization  
484 buffer + 5 mM EDTA), followed by incubation with 500 µl wash buffer at 46 °C in the dark. To  
485 visualize sporoplasms and spores simultaneously, the final incubation was replaced with 500 µl  
486 DY96 solution and incubated in the dark at room temperature prior to resuspension in 20 µl of  
487 EverBrite™ Mounting Medium (Biotium).

488

#### 489 **Microscopy and image quantification**

490 All imaging was performed using an Axio Imager.M2 (Zeiss), except for images of the  
491 transcriptional reporter in Figure S6, which were generated using an Axio Zoom V.16 (Zeiss) at a  
492 magnification of 45.5x. Images were captured via Zen software and quantified under identical  
493 exposure times per experiment. Gravidity is defined as the presence of at least one embryo per  
494 worm, and animals were considered infected by 72 hours if clumps of spores were visible in the  
495 body of animals as seen by DY96. FISH-stained animals were considered infected if at least one  
496 sporoplasm was visible in intestinal cells.

497

498 To quantify fluorescence within animals (Pathogen burden, bead accumulation, GFP), regions of  
499 interest were used to outline every individual worm from anterior to posterior, unless otherwise  
500 specified in methods. Individual worm fluorescence from variable assays (GFP or dsRed) were

501 subjected to the “threshold” followed by “measure” tools in FIJI.<sup>64</sup> To assess PA14::DsRed burden  
502 in transgenic animals, regions of interest were generated from the beginning of the intestines (int1)  
503 to the posterior end of the worm to prevent the *pmyo2::mCherry* co-injection marker signal from  
504 interfering with quantifications. When assessing pathogen burden in gravid animals stained with  
505 DY96, thresholding was used to quantify spore signal without including signal from embryos.

506

### 507 ***Pseudomonas aeruginosa* infection experiments**

508 For all *Pseudomonas* assays, a single colony was picked into 3 ml of LB and grown overnight at  
509 37°C, 220 rpm for 16-18 hours. 20 µl (for 3.5-cm plate) or 50 µl (for 6-cm plate) of culture was  
510 spread onto slow killing (SK) plates to form a full lawn, except in the case of competitive fitness  
511 assays (see below). Seeded plates were placed at 37°C for 24 hours, followed by 25°C for 24 hours  
512 prior to use. Plates were seeded fresh prior to each experiment. To assess colonization, 1,000  
513 synchronized animals were grown on PA14::dsRED for either 24 or 48 hours at 25°C. Animals  
514 were washed off with 1ml M9+ 0.1%Tween-20, and washed twice thereafter, prior to fixation.

515

516 To quantify survival of individual strains on PA14, 3.5-cm SK plates were seeded with 20 ul of  
517 PA14, to form full lawns. 60 L4s were picked onto each of three, 3.5-cm plates per strain, and 24  
518 hours later, 30 animals from each were picked onto a new 3.5-cm plate (T24hrs). Survival was  
519 monitored from 24 hours post L4, three times per day. Survival was assessed based on response to  
520 touch. Carcasses were removed, and surviving animals were placed onto fresh 3.5-cm plates every  
521 24 hours. Animals were grown at 25°C for the duration of the experiment. Technical triplicate data  
522 was pooled to represent a single biological replicate. The experiment was carried out until no more

523 worms had survived. Survival curves were generated via GraphPad Prism 9.0, and the Log rank  
524 (mantel-cox) test was used to generate P-values.

525

### 526 **Transgenic strain construction**

527 N2 or *aaim-1* (*kea22*) animals were injected with a 100 ng/μl injection mix composed of  
528 50 ng/μl of template, 5 ng/μl of *pmyo2::mCherry*, and 45 ng/μl of pBSK. Three independent lines  
529 were generated for each injected construct.

530

531 Gateway BP cloning<sup>65,66</sup> was performed to insert AAIM-1 and GFP into pDONR221. Around the  
532 horn PCR,<sup>67</sup> was used to insert a 3x Flag sequence at the C-terminus of this construct. Gibson  
533 assembly was used to generate different tissue specific clones driving *aaim-1* expression. *Paaaim-*  
534 *1*, *aaim-1* and *pspp-5* were cloned from N2 genomic DNA, *pmyo2* was cloned from pCFJ90. GFP  
535 and 3x Flag sequences were cloned from pDD282. *SPΔaaim-1* was amplified from *aaim-1::3xFlag*  
536 in pDONR221 by omitting the first 17 amino acids, the putative secretion signal as predicted via  
537 SignalP 5.0.<sup>68</sup> All clones possessed an *unc-54* 3' UTR. See Supplemental table 3 for primer  
538 sequences.

539

### 540 **CRISPR-Cas9 mutagenesis**

541 To generate a deletion allele of *aaim-1* via CRISPR-Cas9 mutagenesis, steps were taken as  
542 described here.<sup>69</sup> Briefly, 2 crRNA's were designed using CRISPOR,<sup>70</sup> near the start and stop sites  
543 of *aaim-1* and generated via IDT. A repair template was designed to contain 35 base pairs of  
544 homology upstream and downstream of the cut sites. *Streptococcus pyogenes* Cas9 3NLS  
545 (10ug/ul) IDT and tracrRNA (IDT #1072532) were utilized. Reaction mixes were prepared as



546 described previously.<sup>69</sup> pRF4 was co-injected with the Cas9 ribonucleoprotein, and F1 rollers  
547 picked. Deletions were identified via PCR primers situated outside the cut sites.

548

#### 549 **Bead-feeding assays**

550 1,000 synchronized L1 animals were mixed with 0.2  $\mu\text{m}$  green fluorescent polystyrene beads  
551 (Degradex Phosphorex) at a ratio of 25:1 in a final volume of 400  $\mu\text{l}$  containing 10  $\mu\text{l}$  of 10x *E.*  
552 *coli* OP50, 16  $\mu\text{l}$  of beads and up to 400  $\mu\text{l}$  with M9. Animals were incubated with beads for 3  
553 hours, washed off with M9 + 0.1% Tween-20 and fixed with 4% PFA for 30 min at room  
554 temperature. Bead accumulation was measured as a percentage of the total animal exhibiting  
555 fluorescent signal, using FIJI.

556

#### 557 **Lifespan Assays**

558 Lifespan assays were performed as described previously.<sup>71</sup> In brief, 120 synchronized L4 animals  
559 were utilized per strain, with 15 animals placed on a single 3.5-cm NGM plate (A total of 8 plates,  
560 with 15 animals each per strain). Animals were transferred to a new seeded 3.5-cm NGM plate  
561 every 2 days, for a total of 8 days (4 transfers), ensuring no progeny were transferred alongside  
562 adults. After day 8, survival was quantified daily, on the same plate, via response to touch. Any  
563 animals that exhibited internal hatching, protruding intestines, or were found desiccated on the  
564 edges of the plate were censored. Survival curves were generated via GraphPad Prism 9, and the  
565 Log rank (mantel-cox) test was used to generate P values.

566

#### 567 **Immunofluorescence (IF)**

568 IF was performed as described previously,<sup>72</sup> however all steps post-dissection were performed in  
569 microcentrifuge tubes, and intestines were pelleted on a mini tabletop microcentrifuge for a few  
570 seconds. Briefly, animals were dissected to extrude intestinal tissue. Two 25mm gauge needles on  
571 syringes were used to create an incision near the head and/or tail of the animals. Dissections were  
572 performed in 5  $\mu$ l of 10 mM levamisole on glass slides to encourage intestinal protrusion. Fixation,  
573 permeabilization and blocking was performed as described previously.<sup>72</sup> Primary M2 anti-Flag  
574 antibody (Sigma F1804) was used at 1:250 overnight at 4°C, and secondary goat anti-mouse Alexa  
575 fluor 594 (Thermo Fisher A32742) at 1:300 for 1 hour at room temperature. Animals were mounted  
576 in 20  $\mu$ l of EverBrite™ Mounting Medium (Biotium) and placed on glass slides for imaging.

577

#### 578 **Competitive fitness assays**

579 N2 or *aaim-1* mutants were grown together with RFP::Znfx1 YY1446 (*gg634*), which labels the  
580 germ granules and can be observed in all developmental stages<sup>73</sup>. For *N. parisii* infections, 10-cm  
581 NGM plates were seeded with 1 ml of 10xOP50 and a medium-2 dose of spores (no spores were  
582 used for uninfected plates). 10 L1s from each strain were picked onto lawns of spores and *E. coli*  
583 OP50 immediately after drying, and grown for 8 days at 21°C, washed off with M9 + 0.1% Tween-  
584 20, and fixed. For *P. aeruginosa* infections, 3.5-cm SK plates were seeded with a single spot of 20  
585  $\mu$ l of PA14 in the center of the plate. 10 L1s of each strain were placed on plates and grown at  
586 21°C for 8 days and then washed off with M9 + 0.1% Tween-20. The percentage of animals that  
587 did not display RFP germ granules (i.e. N2 or *aaim-1* mutants) is was determined by quantifying  
588 all animals on the plate, including F1 adults and L1/L2 staged F2 animals.

589

#### 590 **Co- infections with *N. parisii* and *P. aeruginosa***

591 Co-infection assays were performed by first pulse infecting co-infection and *N. parisii* single  
592 infection groups with an maximal dose of spores for three hours on unseeded 6-cm NGM plates  
593 as described above. PA14::DsRed single infections were pulsed with a volume of M9 to match  
594 that of the spores. Animals were then washed off in 1ml of M9 + 0.1%Tween-20, followed by 2  
595 more washes, prior to placement on full lawns of PA14::DsRed on a 6-cm SK plates prepared as  
596 described above. *N. parisii* single infections were placed on a 6-cm NGM plate pre-seeded with  
597 200 µl of 10xOP50. Plates were incubated at 21°C.

598

### 599 **Phylogenetic analysis**

600 Homology between AAIM-1 and other proteins was determined with protein BLAST  
601 (<https://blast.ncbi.nlm.nih.gov/Blast.cgi>) using default parameters. Sequences with less than E-5  
602 were aligned using MUSCLE (<https://www.ebi.ac.uk/Tools/msa/muscle/>) using default  
603 parameters. Phylogenetic tree of homologs was generated using RAxML BlackBox [https://raxml-](https://raxml-ng.vital-it.ch/#/)  
604 [ng.vital-it.ch/#/](https://raxml-ng.vital-it.ch/#/) using default parameters and 100 boot straps. Tree was visualized using FigTree  
605 v1.4.4 (<http://tree.bio.ed.ac.uk/software/figtree/>).

606

### 607 **Statistical analysis**

608 All data analysis was performed using GraphPad Prism 9.0. One-way Anova with post hoc (Tukey  
609 test) was used for all experiments unless otherwise specified in figure legends. Statistical  
610 significance was defined as  $p < 0.05$ .

611

### 612 **Acknowledgements**

613 We thank Ashley M. Campbell, Alexandra R. Willis, and Kristina Sztanko for providing helpful  
614 comments on the manuscript. This work was supported by the Canadian Institutes of Health  
615 Research grant no. 400784 and an Alfred P. Sloan Research Fellowship FG2019-12040 (to  
616 A.W.R.). This work was supported by National Institutes of Health ([www.nih.gov](http://www.nih.gov)) under R01  
617 AG052622 and GM114139 to E.R.T. Some strains were provided by the CGC, which is funded  
618 by NIH Office of Research Infrastructure Programs (P40 OD010440) and we thank WormBase.

619

620 **Author contributions:**

621 **H.T.E.J. and A.W.R.** designed experiments, analyzed results, and co-wrote the paper.

622 **H.T.E.J.** conducted all experiments, except the initial forward genetic screen performed by

623 **A.W.R.**

624 **C.M.** designed and performed bioinformatic analysis for the MIP-map experiment.

625 **M.R.S.** analyzed whole genome sequencing to identify causal mutations in *fawn* animals.

626 **E.R.T., A.G.F., and A.W.R.** provided mentorship and acquisition of funding.

627

628 **Competing interests:** The authors declare they have no competing interests.

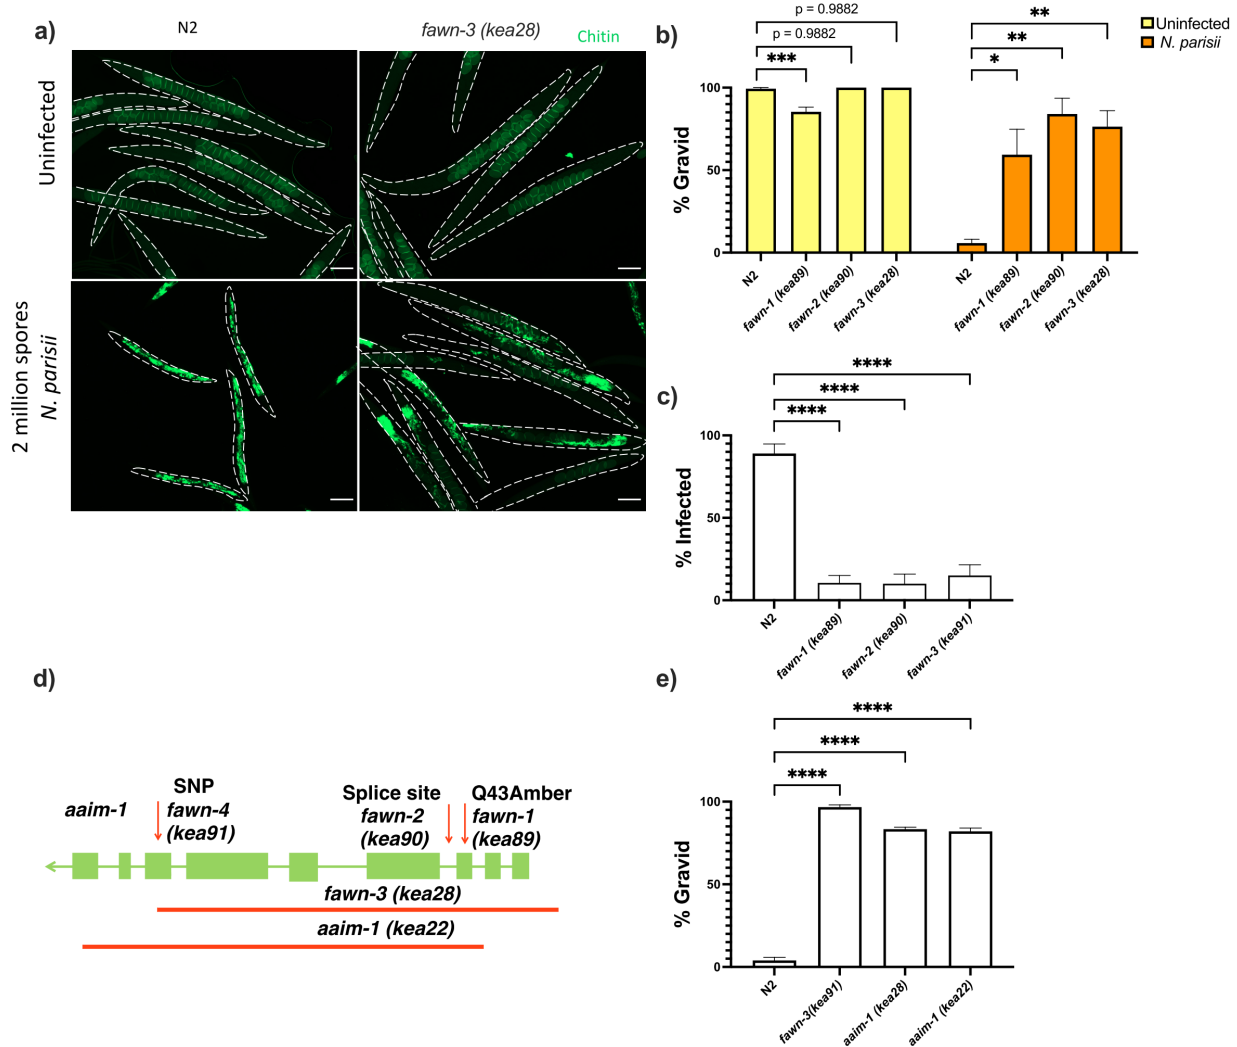

629

630 **Figure 1: Mutations in *aaim-1* result in resistance to *N. parisi* infection.**

631 (a-c, and e) L1 stage Wild-type (N2) and *aaim-1* mutant animals were infected with either a high  
 632 dose (a, b, and e) or a very loose dose (c) of *N. parisi*, fixed at 72 hours, and stained with direct-  
 633 yellow 96 (DY96). (a) Representative images stained with DY96, which stains *C. elegans* embryos  
 634 and microsporidia spores. Scale bars, 100  $\mu$ m. (b and e) Percentage of worms that are gravid. (c)  
 635 Percentage of worms that contain newly formed *N. parisi* spores. (d) Schematic depicting the  
 636 nature and location of the different *aaim-1* alleles. Boxes represent exons, and connecting lines  
 637 represent introns. Arrows depict point mutations, and the solid red line depicts deletions. *fawn-3*

638 has a 2.2 kb deletion and *aaim-1* (*kea22*) has a 2.3 kb deletion. *fawn-1* carries a C127T , Q43Stop  
639 mutation, *fawn-2* carries a G221A splice site mutation and *fawn-4* carries a C1286T, A429V  
640 mutation in *aaim-1*.(b,c, and e) Data is from three independent replicates with at least 90 animals  
641 counted per replicate. Mean  $\pm$  SEM represented by horizontal bars. P-values determined via one-  
642 way ANOVA with post hoc. Significance defined as: \*  $p < 0.05$ , \*\*  $p < 0.01$ , \*\*\*  $p < 0.001$ , \*\*\*\*  
643  $p < 0.0001$ .

644

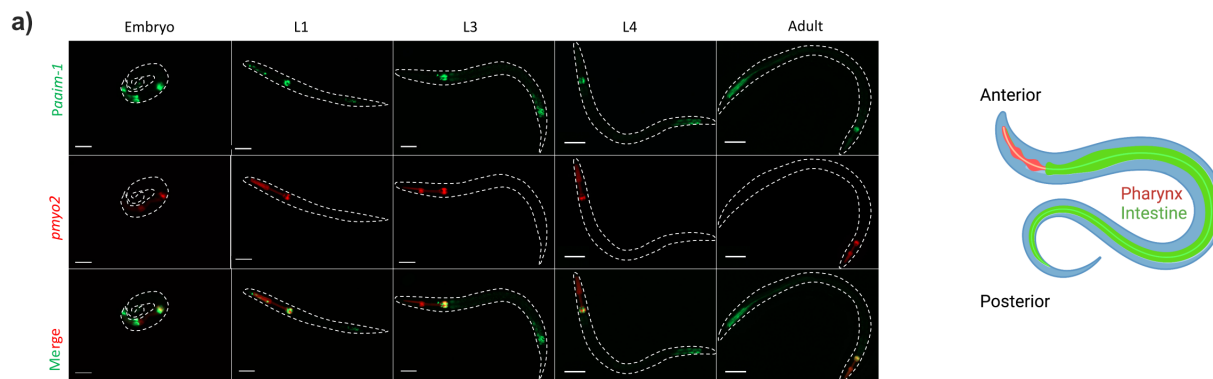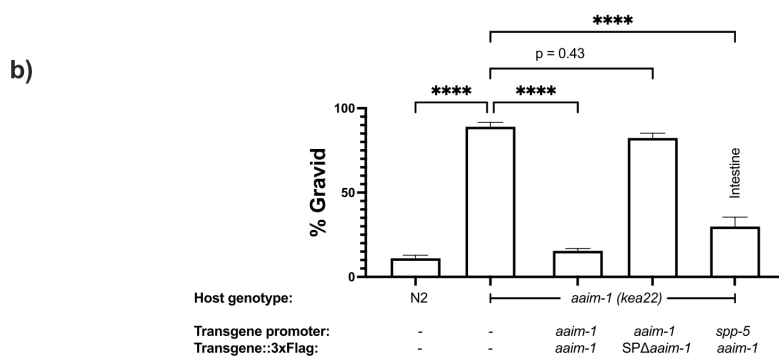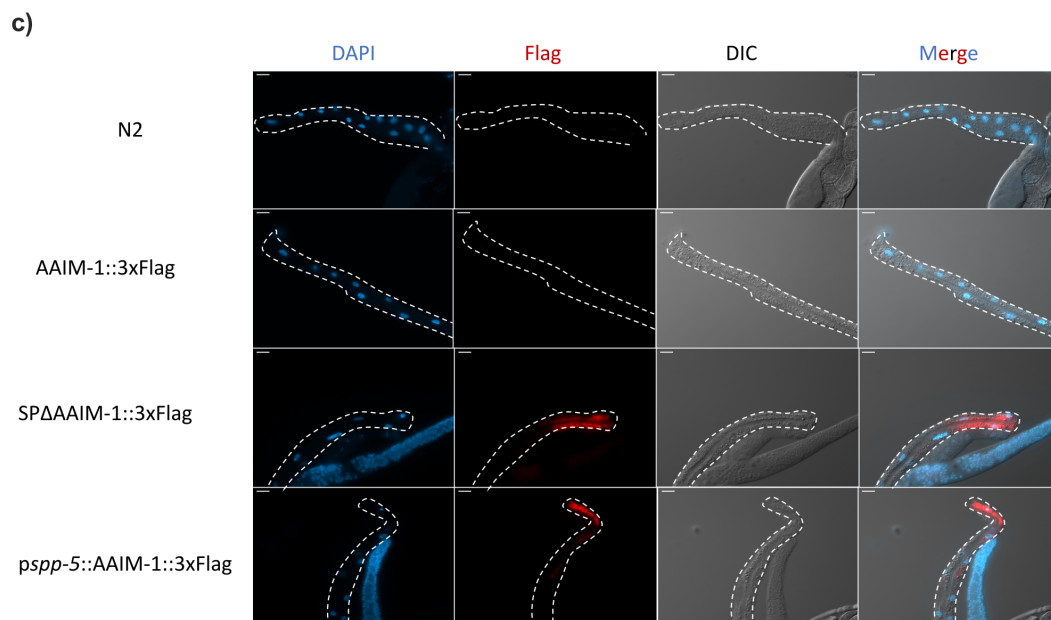

645

646

647

648 **Figure 2: AAIM-1 is secreted from intestinal cells.**

649 (a) Wild-type worms containing an extrachromosomal array expressing GFP from the *aaim-1*  
650 promoter and mCherry in the pharyngeal muscles were imaged at the embryo, L1, L3, L4, and  
651 adult stage. Embryo, L1 and L3 animals were imaged at 40x, scale bar 20  $\mu\text{m}$  and L4 and adult  
652 animals were imaged at 20x, scale bar 50  $\mu\text{m}$ . L1 to L4 are oriented anterior to posterior and adult  
653 oriented posterior to anterior from left to right. Schematic made with Biorender.com (b) N2, *aaim-*  
654 *1*, and *aaim-1* expressing extrachromosomal arrays were infected with a medium-2 dose of *N.*  
655 *parisii*. Percentage of worms that are gravid. Experiment is from three independent replicates with  
656 at least 90 worms quantified per replicate. Mean  $\pm$  SEM represented by horizontal bars. P-values  
657 determined via one-way ANOVA with post hoc. Significance defined as \*\*\*\* p < 0.0001 (c)  
658 Intestines (denoted by dashed lines) of 72-hour post-L1 adults were dissected and stained using  
659 anti-Flag (red) and DAPI (blue). Images taken at 40x, scale bar 20  $\mu\text{m}$ .



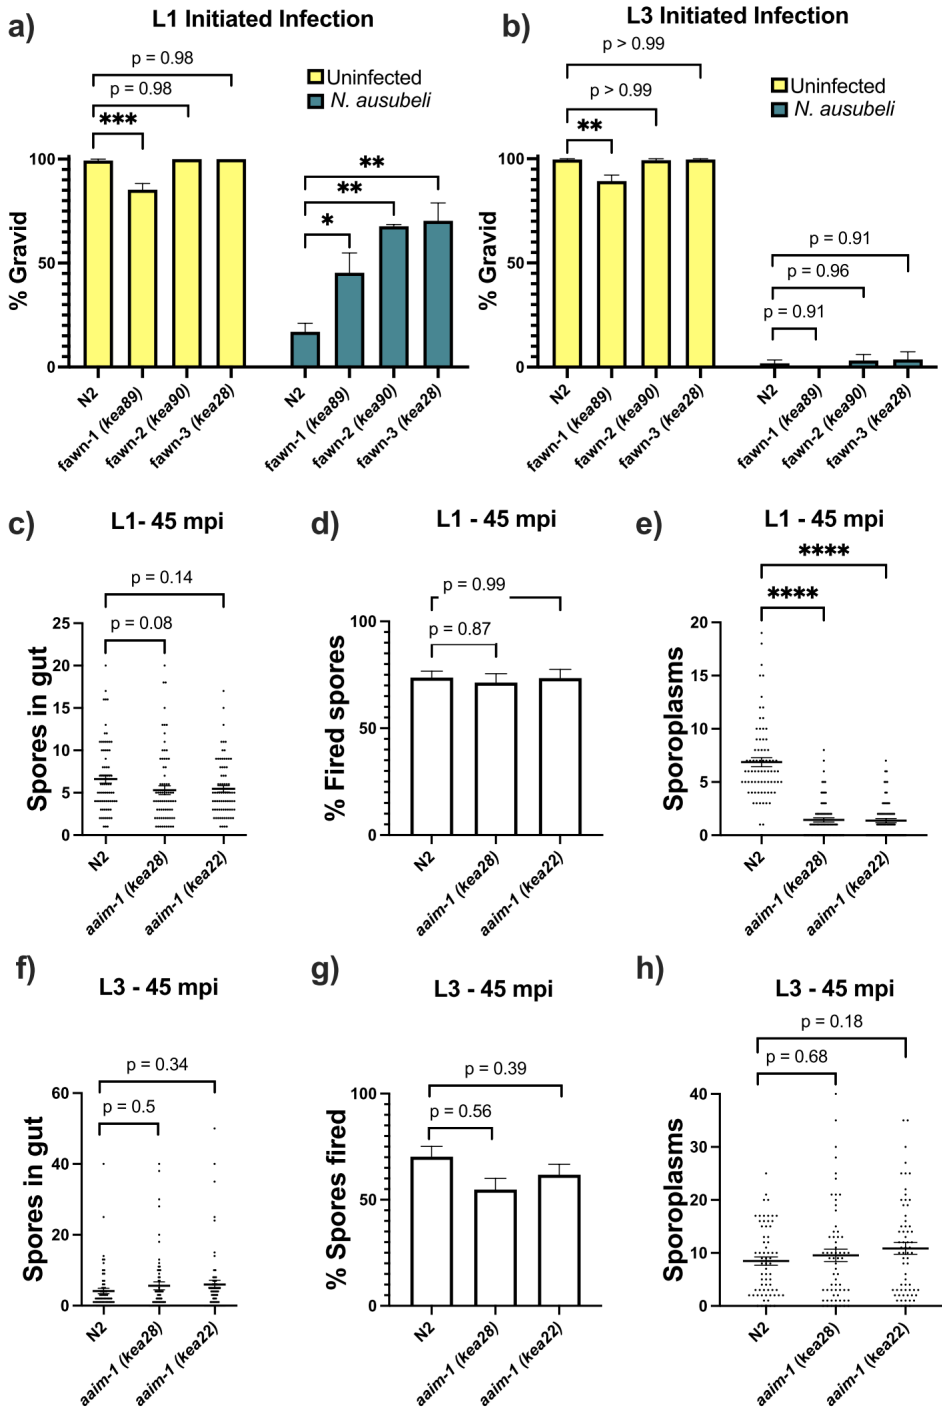

660

661 **Figure 3: *aaim-1* mutants are resistant to microsporidia at the earliest larval stage due to**

662 **spore misfiring. (a-b) N2 and *aaim-1* mutants were infected with a medium dose of *N. ausubeli***

663 **at either the L1 stage for 72 hours (a) or a high doses of *N. ausubeli* at the L3 stage for 48 hours**

664 (b) Percentage of worms that are gravid. (c-f) N2 and *aaim-1* animals were infected with a  
665 medium-3 dose of *N. parisii* for 45 minutes at L1 (c-e) or L3 hours (f-h), fixed, and then stained  
666 with DY96 and *N. parisii* 18S RNA fish probe. The number of spores per animal (c,f), the  
667 percentage of spores fired (d,g), and the number of sporoplasm per worm (e,h) are displayed. (a-  
668 b) Experiment is of three replicates of at least 100 animals. (c-h) Experiment is of three replicates  
669 of 20-30 animals. (a-h) Mean  $\pm$  SEM represented by horizontal bars. P-values determined via one-  
670 way ANOVA with post hoc. Significance defined as: \*  $p < 0.05$ , \*\*  $p < 0.01$ , \*\*\*  $p < 0.001$ , \*\*\*\*  
671  $p < 0.0001$ .

672

673

674

675

676

677

678

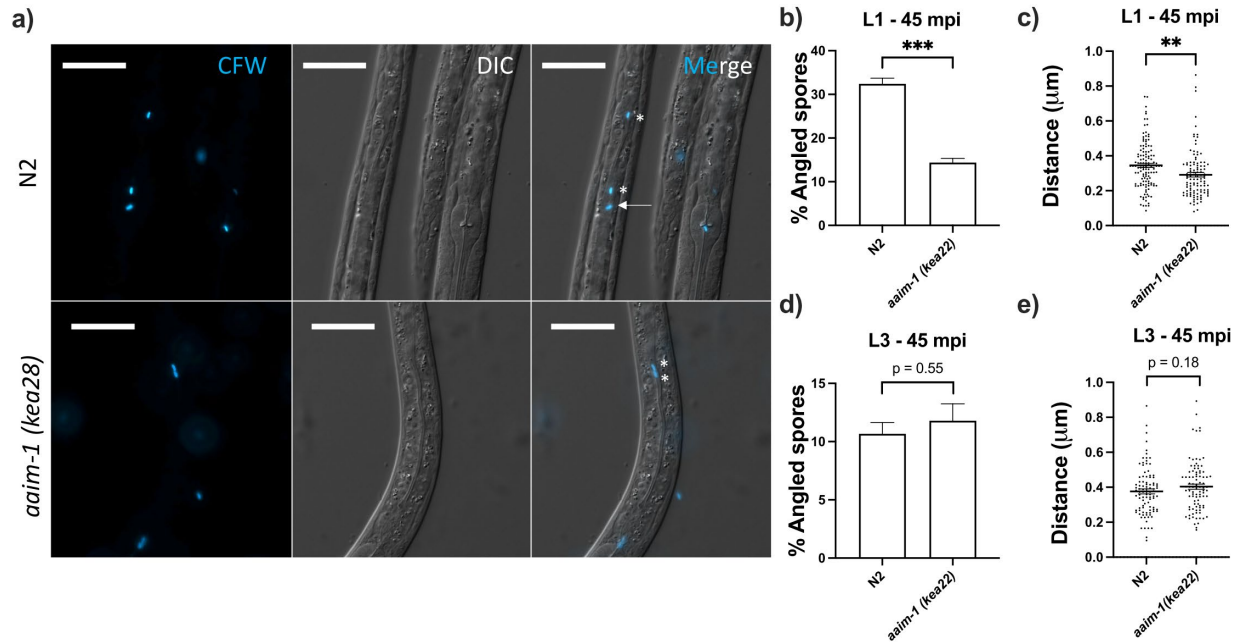

679

680 **Figure 4: Spores in *aaim-1* mutants display improper orientation and distance to the apical**  
681 **intestinal membrane.**

682 (a-e) N2 and *aaim-1(kea22)* animals were infected with a very high dose of Calcofluor white  
683 (CFW) pre-stained *N. parisii* spores for 45 minutes at either the L1 stage (a-c) or the L3 stage (d-  
684 e). (a) Representative images of live animals containing stained spores (blue). Arrow indicates an  
685 example of an angled spore, asterisks indicate parallel spores. Images taken at 40x, scale bar 20  
686  $\mu\text{m}$ . (b, d) Percentage of angled spores. The experiment consists of three replicates with at least 90  
687 spores per replicate. (c, e) Distance of the center of each spore from the intestinal apical membrane.  
688 The experiment consisted of three replicates of at least 25 spores per replicate. Mean  $\pm$  SEM  
689 represented by horizontal bars. P-values determined via unpaired Student's t-test. Significance  
690 defined as \*\*  $p < 0.01$ , \*\*\*  $p < 0.001$ .

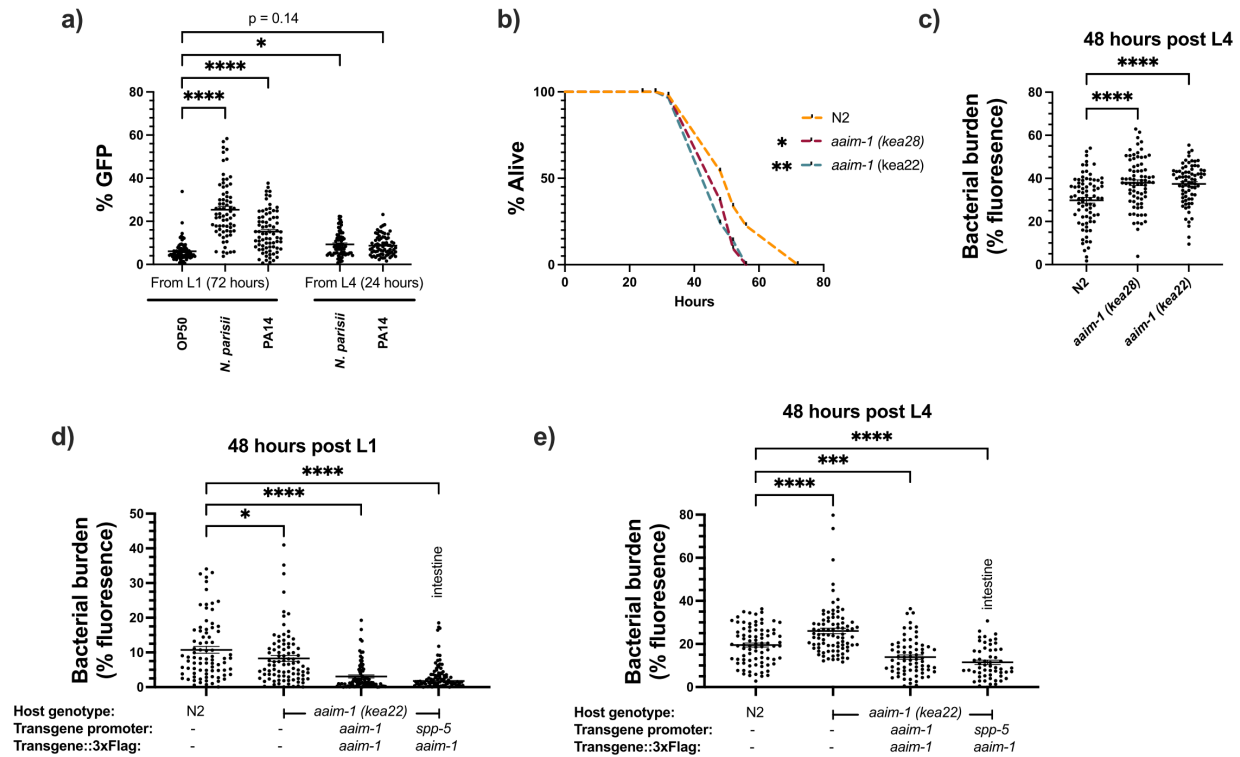

691

692 **Figure 5: *aaim-1* is upregulated by *N. parisii* and *P. aeruginosa* and *aaim-1* animals are**  
 693 **susceptible to infection by *P. aeruginosa*.**

694 (a) Expression of *paaim-1*GFP::3xFlag in response to infection with either PA14 or *N. parisii* for  
 695 either 72 hours from L1 or 24 hours from L4. 18-25 animals quantified per replicate. Every point  
 696 represents a single worm. Percentage GFP was measured as the percentage of the animal  
 697 containing GFP via FIJI. n=3. (b) L4 stage N2 and *aaim-1* were plated on full lawns of *P.*  
 698 *aeruginosa* PA14 and the percentage of animals alive was counted over the course of 96 hours.  
 699 Three independent replicates were carried out, and a representative replicate is displayed. 40  
 700 worms were quantified per strain. P-values determined via Log-rank (Mantel-Cox) test.  
 701 Significance defined as \*  $p < 0.05$ , \*\*  $p < 0.01$ . (c-e) N2, *aaim-1*, or *aaim-1* with different  
 702 extrachromosomal arrays were plated on PA14::DsRed as either L1 stage (d) or L4 stage (c,e) for  
 703 48 hours. Bacterial burden was measured as the percentage of the animal containing

704 PA14::dsRED. Three independent replicates carried out, 20-30 worms were quantified per  
705 replicate. Every point represents a single worm. Mean  $\pm$  SEM represented by horizontal bars. (a,  
706 c-e) P- values determined via one-way ANOVA with post hoc. Significance defined as \*  $p < 0.05$ ,  
707 \*\*  $p < 0.01$ , \*\*\*  $p < 0.001$ , \*\*\*\*  $p < 0.0001$ .

708

709

710

711

712

713

714

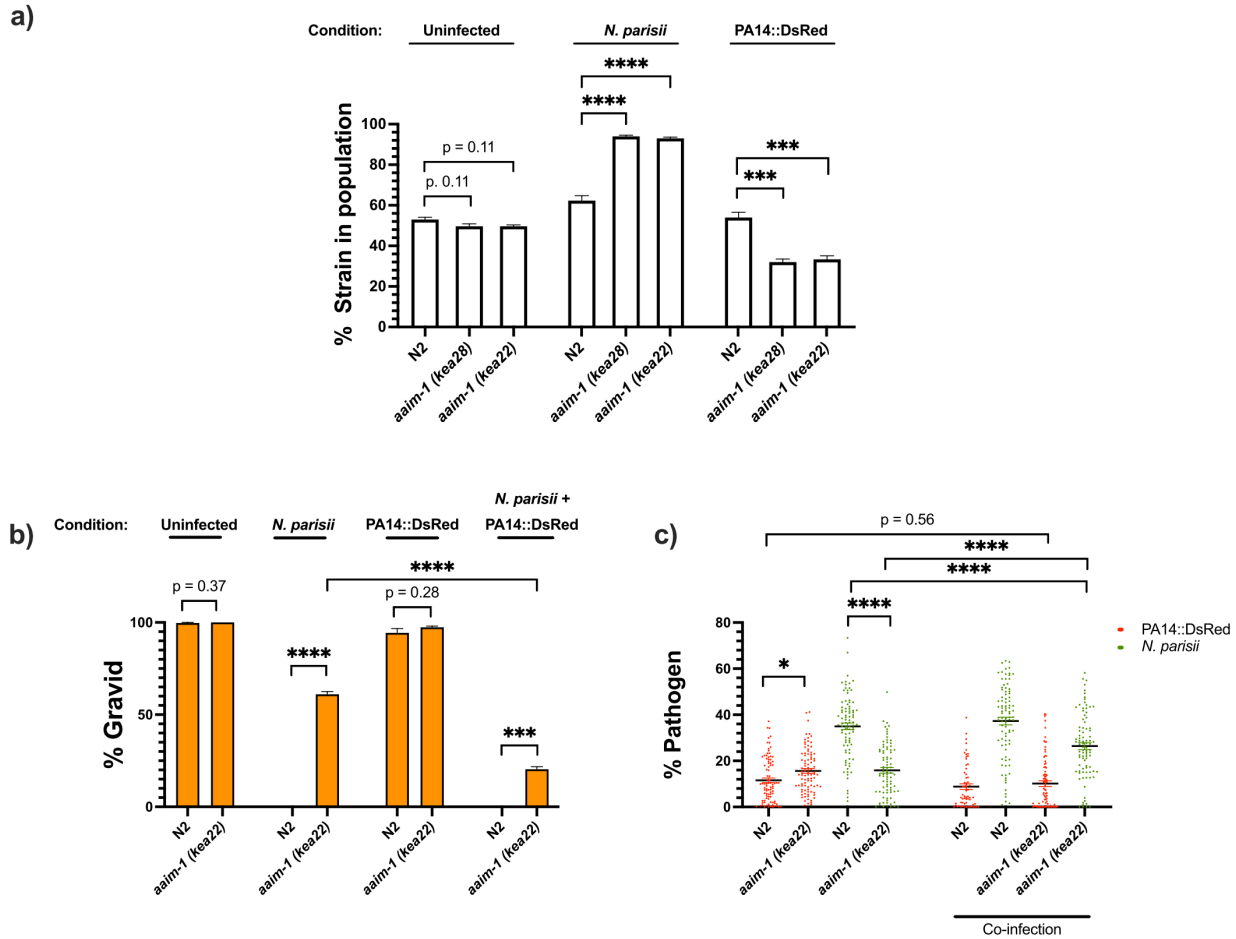

715

716 **Figure 6: *aaim-1* alleles display enhanced fitness on *N. parisi*, but reduced fitness on *P.***  
 717 ***aeruginosa*.**

718 (a) Competitive fitness assays performed with a fluorescently marked strain (RFP::ZNF1) mixed  
 719 with either N2 or *aaim-1* mutants. These mixed populations of animals were plated at the L1 stage  
 720 on either *E. coli*, a medium-2 dose of *N. parisi*, or on *P. aeruginosa*. After 8 days, the fraction of  
 721 animals that did not display fluorescent germ granules was counted. Experiment consisted of three  
 722 replicates with 20-270 worms quantified per replicate. (b,c) L1 N2 and *aaim-1* animals were either  
 723 uninfected or infected with a maximal dose of *N. parisi*. These infected and uninfected population  
 724 of animals were then washed and placed on either *E. coli* or PA14::DsRed. After 69 hours, animals  
 725 were fixed and stained with DY96. Experiment consisted of three replicates with 60-150 worms

726 quantified per replicate. (b) Percentage of animals that are gravid adults. (c) Quantified amount of  
 727 either *N. parisii* (DY96) or *P. aeruginosa* (PA14::DsRed). 12-30 worms were quantified per  
 728 replicate. Mean  $\pm$  SEM represented by horizontal bars. P-values determined via unpaired Student's  
 729 t-test (a) one-way ANOVA with post hoc (b,c). Significance defined as \*\*  $p < 0.01$ , \*\*\*  $p < 0.001$ ,  
 730 \*\*\*\*

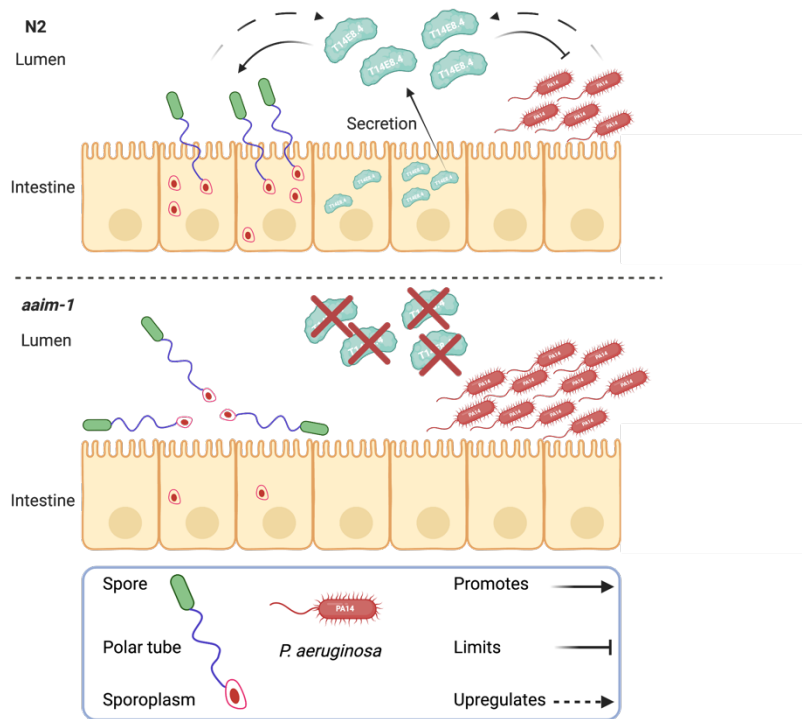

731  
 732 **Figure 7: Secreted AAIM-1 functions in the intestinal lumen to limit bacterial colonization**  
 733 **but is exploited by microsporidia to ensure successful invasion of intestinal cells.**  
 734 AAIM-1 is secreted from intestinal cells, where the protein limits bacterial colonization in the  
 735 lumen. Additionally, AAIM-1 is parasitized by *N. parisii* spores to ensuring successful orientation  
 736 and firing during intestinal cell invasion. Infection by either of these two pathogens results in the  
 737 upregulation of AAIM-1. Figure made with Biorender.com.

738 **Supplemental material**

739 **Figure S1. Mapping and validation of *aaim-1* as the gene associated with resistance to *N.***  
740 ***parisii*.**

741 **Figure S2: AAIM-1 is conserved in both free-living and parasitic nematodes.**

742 **Figure S3: *aaim-1* is expressed in arcade cells and presence of C-terminal 3x Flag tag does**  
743 **not disrupt AAIM-1 function.**

744 **Figure S4: *aaim-1* mutants do not clear *N. parisii* and developmentally restricted *N. parisii***  
745 **invasion defect is not due to a feeding defect.**

746 **Figure S5: Invasion defects in *aaim-1* only occurs at the L1 stage of development and a**  
747 **mutation in *aaim-1* do not alter the width of the intestinal lumen.**

748 **Figure S6: Susceptibility to *P. aeruginosa* PA14 appears at L4.**

749 **Figure S7: A mutation in *aaim-1* does not influence *C. elegans* lifespan.**

750 **Figure S8: List of naturally occurring *aaim-1* variants in wild isolates of *C. elegans*.**

751 **Supplemental table 1: List of strains utilized in this study**

752 **Supplemental table 2: Spore doses utilized in this study.**

753 **Supplemental table 3: Primer sequences.**

754

755

756

757



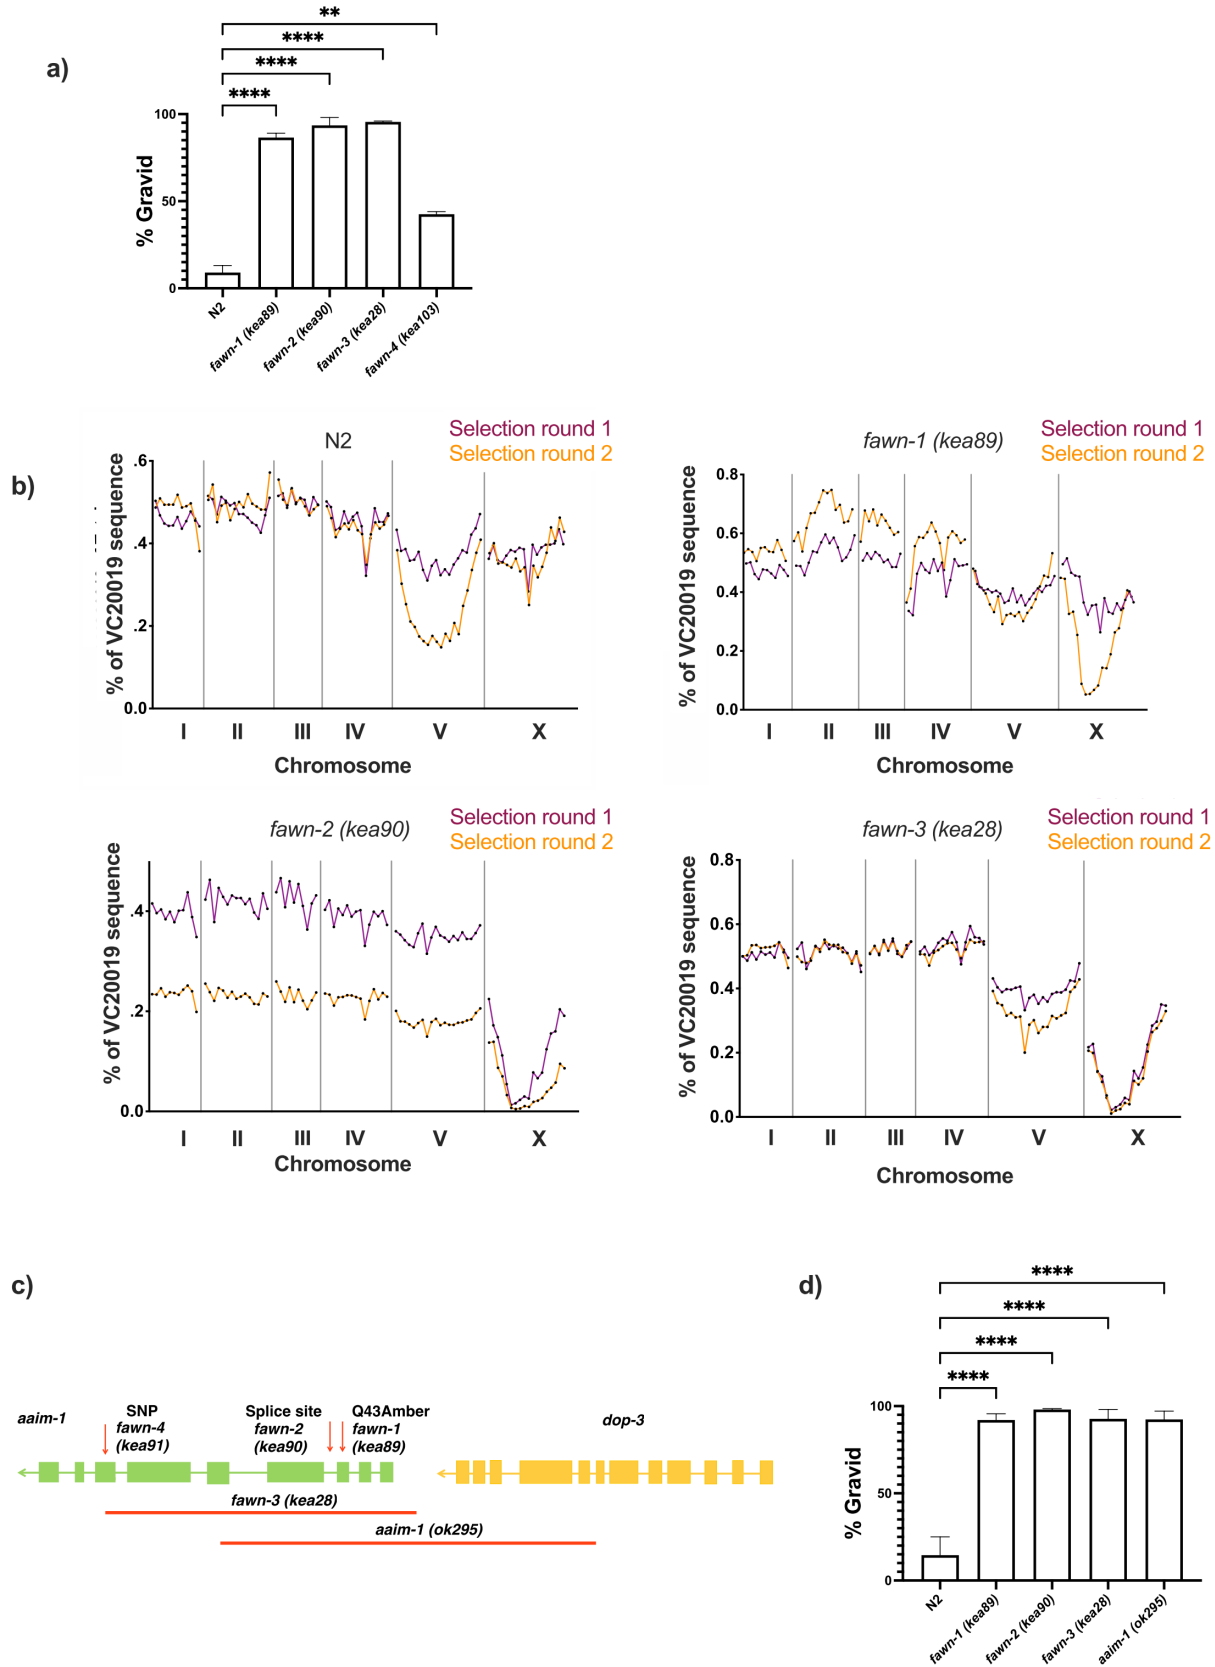

759 **Figure S1. Mapping and validation of *aaim-1* as the gene associated with resistance to *N.***  
760 ***parisii*.**

761 (a) N2 or *fawn* animals were infected with a medium-3 dose of *N. parisii* spores on 6-cm plates,  
762 fixed at 72 hours, and stained with direct-yellow 96 (DY96). Graph displays percentage of worms  
763 that are gravid. Experiment consists of two independent replicates with 66-300 worms quantified  
764 per replicate. (b) F2 recombinants between the mapping strain VC20019 and either N2, *fawn-1*,  
765 *fawn-2*, or *fawn-3* were infected with a medium-2 dose of *N. parisii*. Two rounds of selection were  
766 performed (see methods). The percentage of sequencing reads mapping to the reference strain  
767 VC20019 are depicted on the Y axis, and the linkage groups are depicted on the X axis. Sequencing  
768 of MIPs resulted in capturing the identity of the genome at 89 distinct regions which are  
769 represented as points by their location along the X-axis coordinates. A significantly diminished  
770 percentage of VC20019 indicates an enrichment of non-mapping genomic sequence in that region.  
771 (c) Schematic representing the location and nature of the different *aaim-1* alleles. Boxes represent  
772 exons, and connecting lines represent introns. Arrows represent point mutations and solid red lines  
773 represent large deletions. *fawn-3* has a 2.2 kb deletion and *aaim-1 (kea22)* has a 2.3 kb deletion.  
774 RB563 (*ok295*) possesses a large deletion overlapping two different genes, *aaim-1* and *dop-3*, the  
775 boundaries of which are unclear.<sup>40,74</sup> (d) L1 stage N2 and *aaim-1* mutant animals were infected  
776 with a high dose of *N. parisii*, fixed at 72 hours, and stained with direct-yellow 96 (DY96).  
777 Percentage of gravid worms is shown. Experiment consists of three independent replicates with at  
778 least 100 worms quantified per replicate. Mean  $\pm$  SEM represented by horizontal bars. P-values  
779 determined via One-way Anova with post hoc. Significance defined as \*\*\*\* p < 0.0001.

780

781

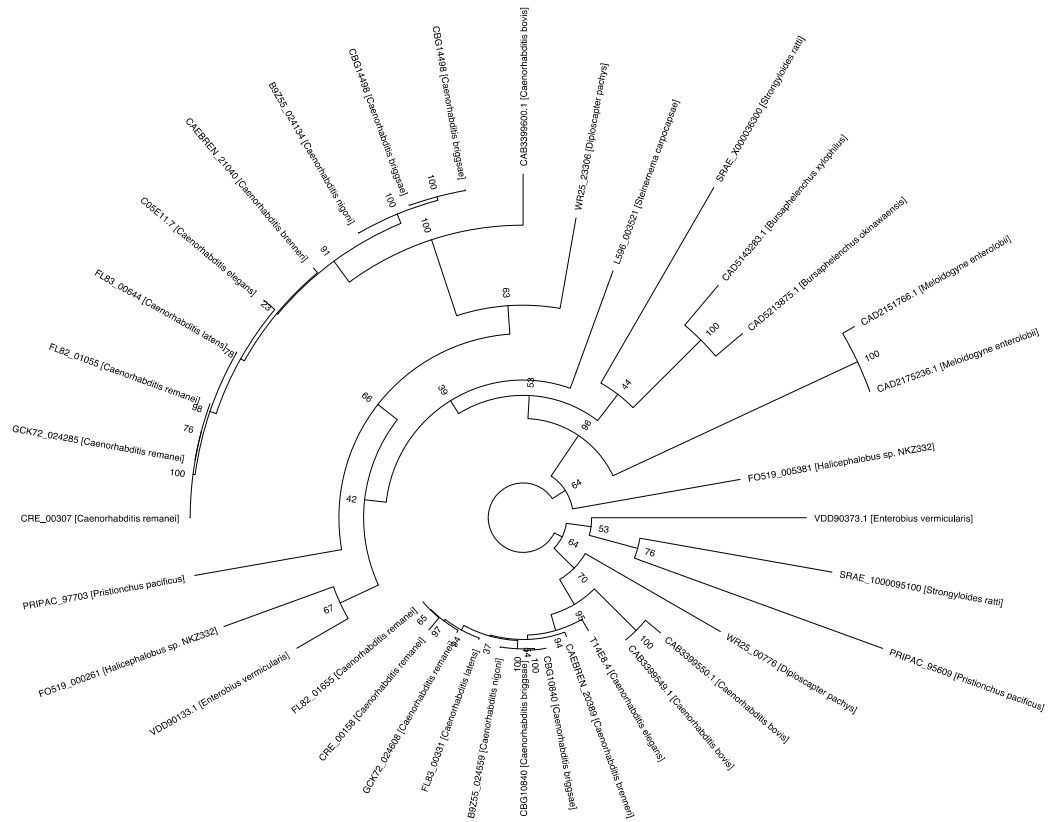

782

783

784

785

786

787

788

789

790

**Figure S2: Homologs of AAIM-1 are present in both free-living and parasitic nematodes.** Phylogenetic tree of AAIM-1 homologs. Bootstrap values are shown at the nodes.

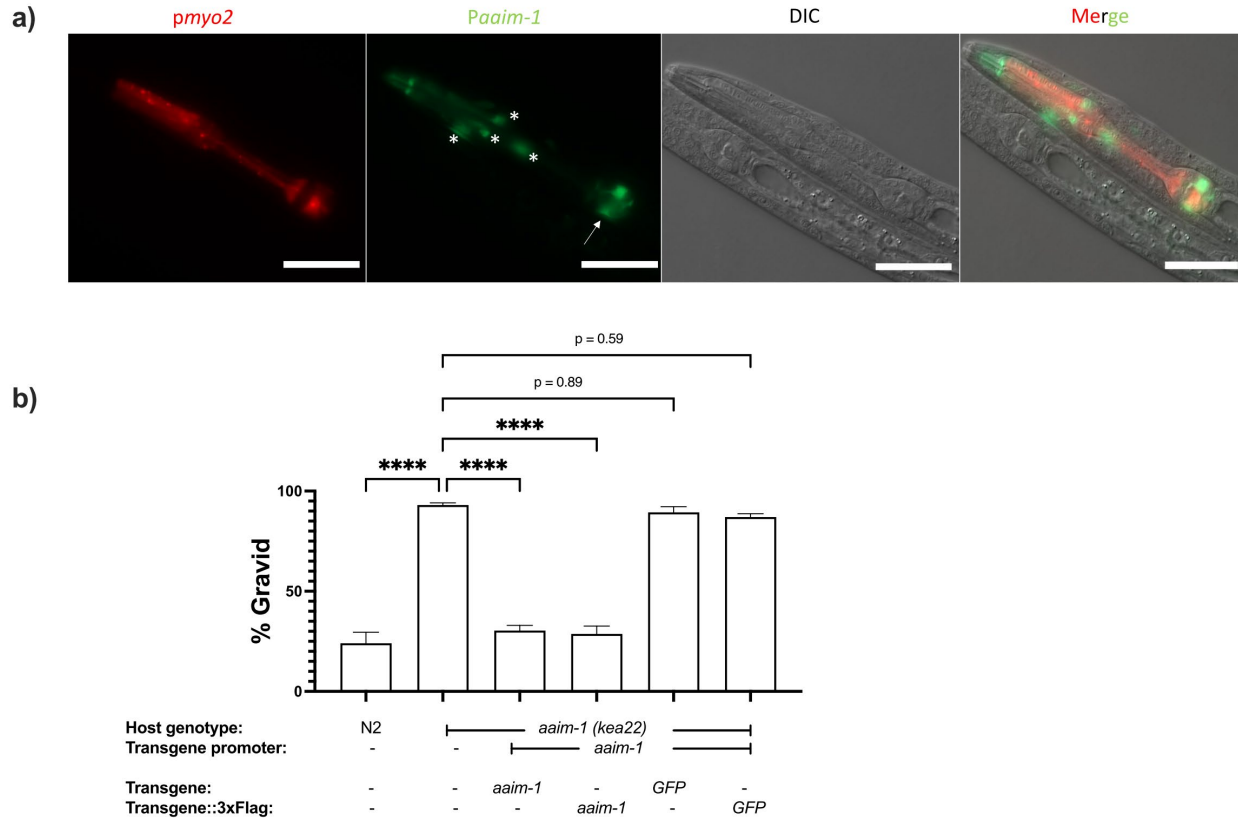

791

792 **Figure S3: *aaim-1* is expressed in arcade cells and presence of C-terminal 3x Flag tag does**  
 793 **not disrupt AAIM-1 function.**

794 (a) N2 containing an extrachromosomal array expressing GFP from the *aaim-1* promoter and  
 795 mCherry in the pharyngeal muscles were imaged at the L1 stage at 40x. Scale bar 20  $\mu$ m. Arrow

796 indicates terminal bulb, and asterisks represent arcade cells. (b) N2, *aaim-1*, and *aaim-1* expressing

797 extrachromosomal arrays of wild-type or 3x Flag tagged constructs were infected with a medium-

798 2 dose of *N. parisii*, fixed at 72 hours, and stained with direct-yellow 96 (DY96). Percentage of

799 gravid worms is shown. Experiment is of three independent replicates of at least 100 animals each.

800 Mean  $\pm$  SEM represented by horizontal bars. P-values determined via one-way ANOVA with post

801 hoc. Significance defined as \*\*\*\*  $p < 0.0001$ .

802

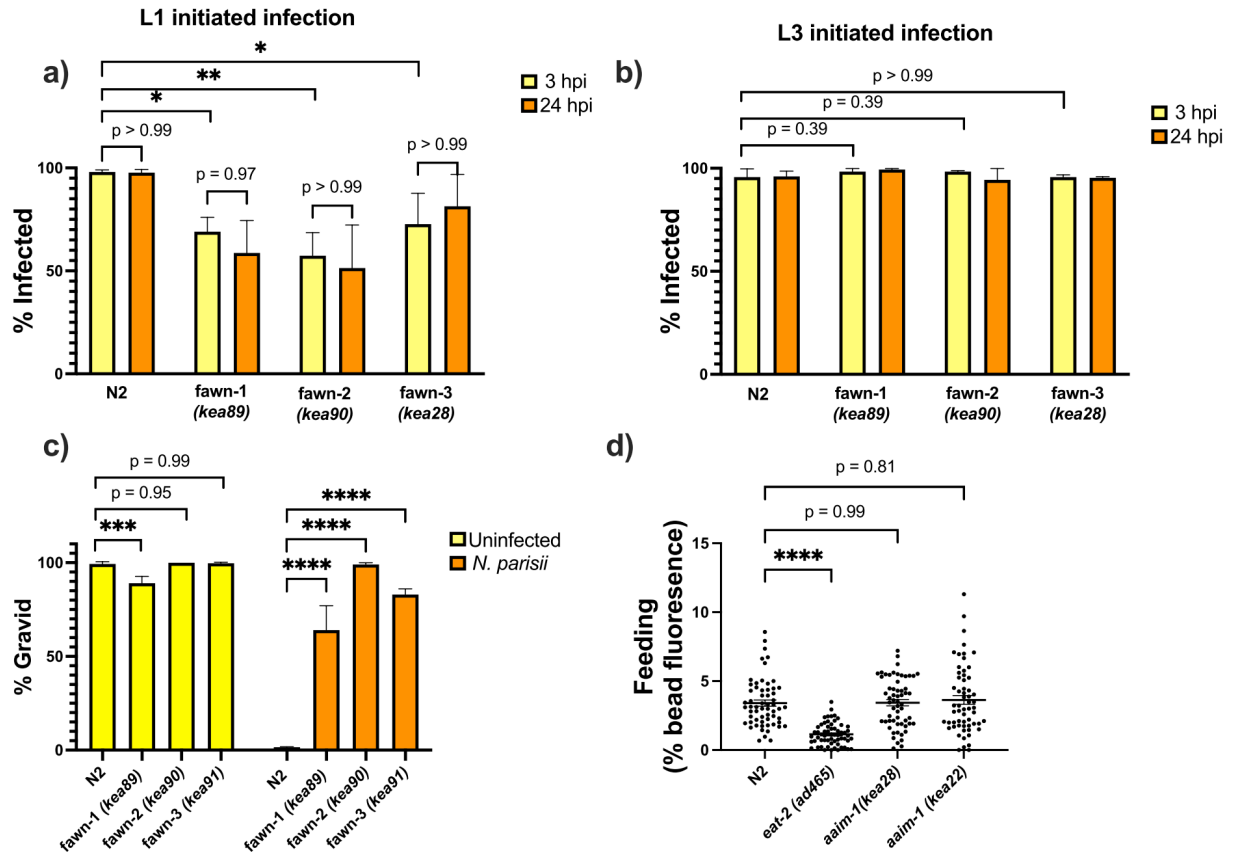

803

804 **Figure S4: *aaim-1* mutants do not clear *N. parisii* and developmentally restricted *N. parisii***

805 **invasion defect is not due to a feeding defect.** (a-b) N2 and *aaim-1* mutants were infected at

806 either the L1 stage (a) or the L3 stage (b) with a medium-1 dose of *N. parisii* spores for 3 hours.

807 Animals were then washed to remove spores and re-plated for an additional 21 hours. Worms were

808 fixed at both the 3 hour and 24 hour timepoints and stained with an *N. parisii* 18S RNA fish probe.

809 Worms containing either sporoplasm or meronts were counted as infected. (c) N2 and *aaim-1*

810 adults were allowed to lay embryos on plates. Adults were removed and a low dose of *N. parisii*

811 was added to the plate. Animals were fixed at 72 hours and stained with direct-yellow 96 (DY96).

812 Percentage of gravid worms is shown. (d) N2 and *aaim-1* mutants were fed fluorescent beads for

813 3 hours. Quantitation of percentage of worm with bead fluorescence. Three replicates were

814 performed experiment with at least 100 worms (a-c) or 20-30 worms (d) quantified per replicate.

815 Mean  $\pm$  SEM represented by horizontal bars. P-values determined via one-way ANOVA with post  
816 hoc. Significance defined as \*  $p < 0.05$ , \*\*  $p < 0.01$ , \*\*\*  $p < 0.001$ , \*\*\*\*  $p < 0.0001$ .

817

818

819

820

821

822

823

824

825

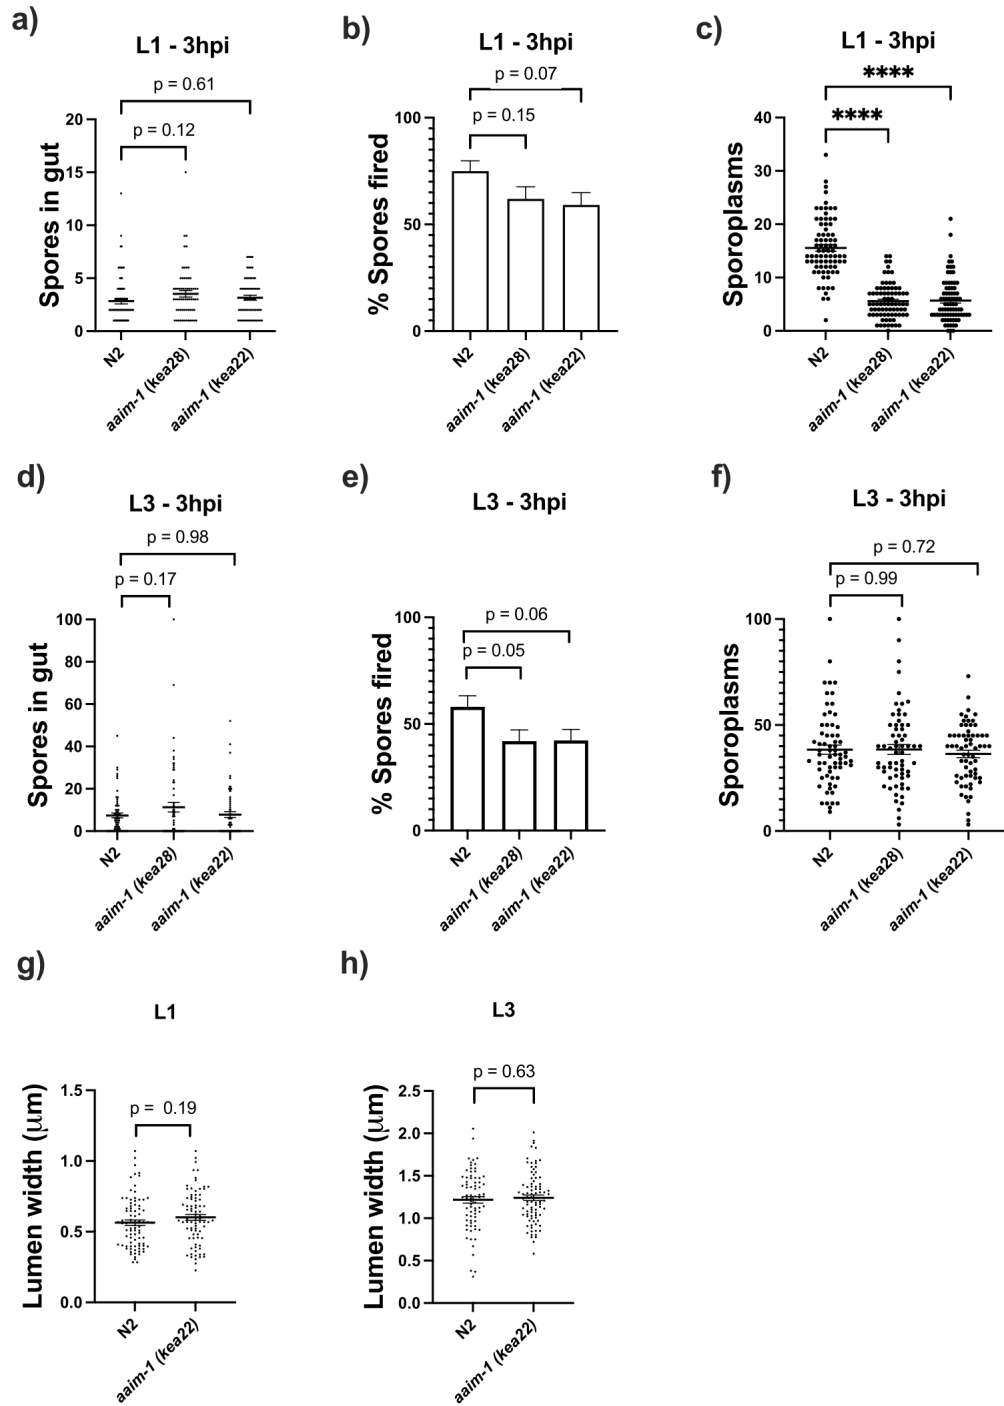

826

827 **Figure S5: Invasion defects in *aaim-1* only occurs at the L1 stage of development and a**

828 **mutation in *aaim-1* do not alter the width of the intestinal lumen.**

829 (a-f) N2 and *aaim-1* animals were infected for 3 hours at L1 (a-c) or L3 (d-f), fixed, and then  
830 stained with DY96 and an *N. parisii* 18S RNA fish probe. The number of spores per animal (a,d)  
831 the percentage of spores fired (b,e) and the number of sporoplasm per worm (c,f) are displayed.  
832 (g,h) The width of the intestinal lumen was measured in L1 (g) or L3 (h) wild-type or *aaim-1*  
833 animals. (a-h) Experiment is of 3 replicates of 16-30 animals each. Mean  $\pm$  SEM represented by  
834 horizontal bars. P-values determined via one-way ANOVA with post hoc (a-f) or Unpaired  
835 Student's t-test (g,h). Significance defined as \*\*\*\*  $p < 0.0001$ .

836

837

838

839

840

841



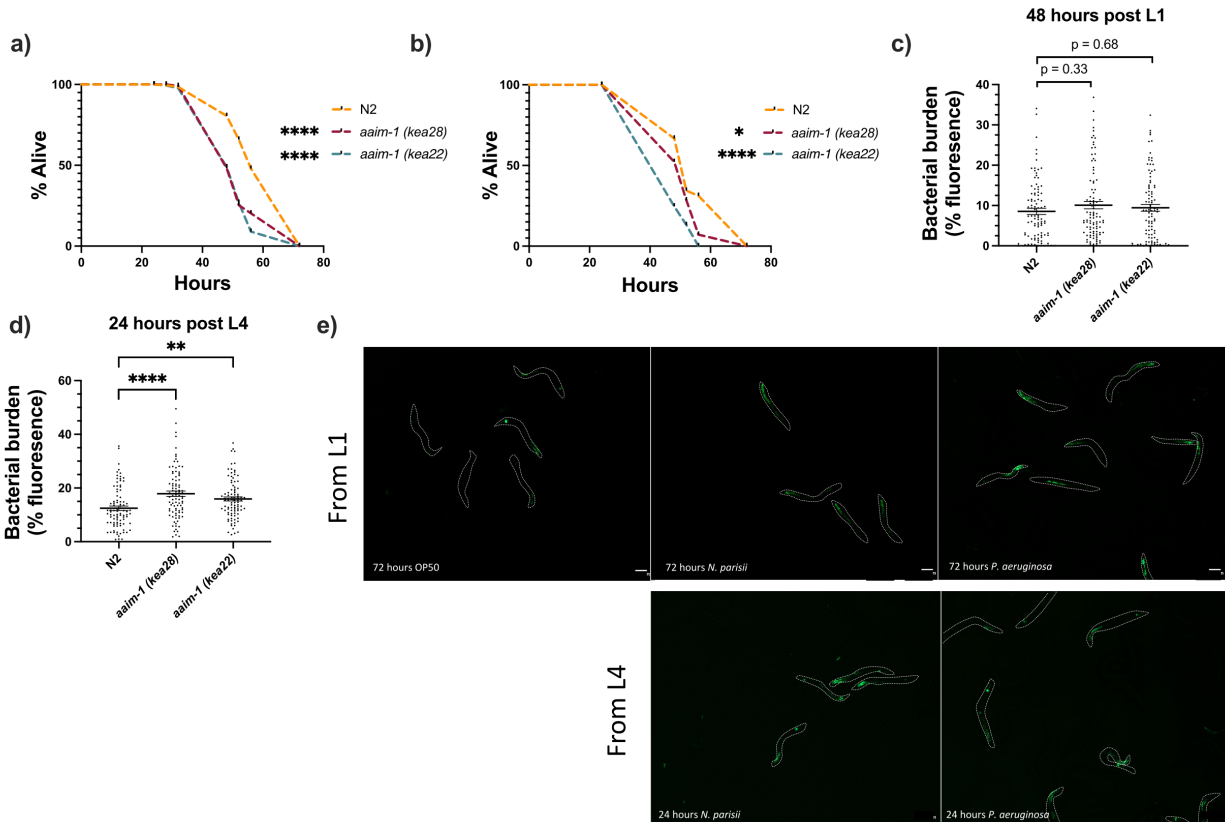

842

843 **Figure S6: Susceptibility to *P. aeruginosa* PA14 appears at L4.**

844 (a,b) Additional replicates of survival assays of animals grown on full lawns of PA14 as in Figure  
 845 5a. (c-d) N2 and *aaim-1* mutants were grown on PA14::DsRed 48 hours post L1 (c) or 24 hours  
 846 post L4 (d). Experiment is of three replicates, with 20-30 worms were quantified per replicate via  
 847 FIJI. Every point represents a single worm. Bacterial burden was measured as the percentage of  
 848 the animal containing PA14::dsRED via FIJI. Mean  $\pm$  SEM represented by horizontal bars. (e)  
 849 *paaim-1::GFP::3xFlag* were exposed to either PA14 or *N. parisii* 72 hours post L1 or 24 hours  
 850 post L4. Animals were imaged at 45.5x, scale bar 500  $\mu$ m. P-values determined via one-way  
 851 ANOVA with post hoc. Significance defined as \*\*  $p < 0.01$ , \*\*\*\*  $p < 0.0001$ .

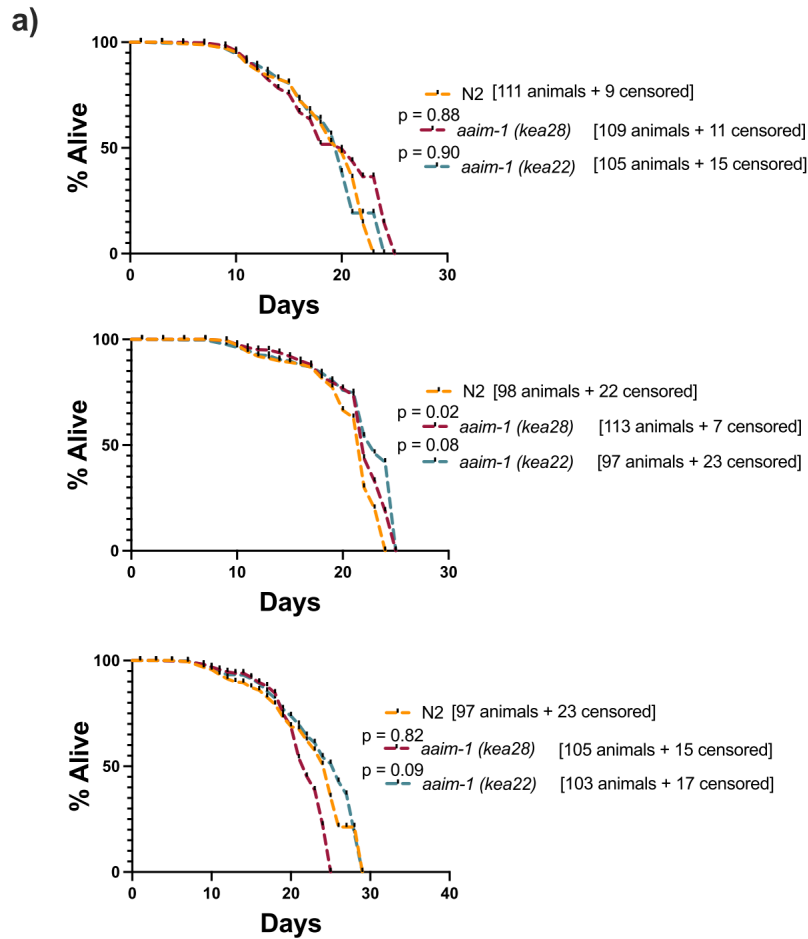

852

853 **Figure S7: A mutation in *aaim-1* does not influence *C. elegans* lifespan.**

854 N2 and *aaim-1* mutants were grown on *E. coli* OP50 for one month, and survival measured as  
855 number of animals responsive to touch. The number of animals quantified, as well as those  
856 censored are denoted on the graph. Three independent survival assays are displayed. P-values  
857 determined via Log-rank (Mantel-Cox) test.

T14E8.4 (X-6559570-6562366)

| CHROM | POS     | REF | ALT | AF   | allele | effect                                 | impact   | gene_name | gene_id        | feature_id | transcript_biotype | nt_change           | aa_change   |
|-------|---------|-----|-----|------|--------|----------------------------------------|----------|-----------|----------------|------------|--------------------|---------------------|-------------|
| X     | 6559573 | A   | G   | 0    | G      | synonymous_variant                     | LOW      | T14E8.4   | WBGene00043981 | T14E8.4.1  | protein_coding     | c.1545T>C           | p.Asn515Asn |
| X     | 6560363 | A   | G   | 0    | G      | synonymous_variant                     | LOW      | T14E8.4   | WBGene00043981 | T14E8.4.1  | protein_coding     | c.1284T>C           | p.Ser428Ser |
| X     | 6560426 | A   | G   | 0    | G      | synonymous_variant                     | LOW      | T14E8.4   | WBGene00043981 | T14E8.4.1  | protein_coding     | c.1221T>C           | p.Tyr407Tyr |
| X     | 6560445 | T   | TA  | 0    | TA     | splice_region_variant&intron_variant   | LOW      | T14E8.4   | WBGene00043981 | T14E8.4.1  | protein_coding     | c.1204-3_1204-2insT | NA          |
| X     | 6560485 | A   | G   | 0.77 | G      | splice_region_variant&intron_variant   | LOW      | T14E8.4   | WBGene00043981 | T14E8.4.1  | protein_coding     | c.1203+7T>C         | NA          |
| X     | 6560524 | C   | G   | 0    | G      | missense_variant                       | MODERATE | T14E8.4   | WBGene00043981 | T14E8.4.1  | protein_coding     | c.1171G>C           | p.Val391Leu |
| X     | 6560647 | C   | A   | 0.02 | A      | missense_variant                       | MODERATE | T14E8.4   | WBGene00043981 | T14E8.4.1  | protein_coding     | c.1048G>T           | p.Ala350Ser |
| X     | 6560670 | A   | G   | 0    | G      | missense_variant&splice_region_variant | MODERATE | T14E8.4   | WBGene00043981 | T14E8.4.1  | protein_coding     | c.1025T>C           | p.Val342Ala |
| X     | 6560810 | T   | A   | 0.01 | A      | missense_variant                       | MODERATE | T14E8.4   | WBGene00043981 | T14E8.4.1  | protein_coding     | c.940A>T            | p.Ile314Phe |
| X     | 6560841 | G   | A   | 0.01 | A      | synonymous_variant                     | LOW      | T14E8.4   | WBGene00043981 | T14E8.4.1  | protein_coding     | c.909C>T            | p.Thr303Thr |
| X     | 6560869 | A   | T   | 0.02 | T      | missense_variant                       | MODERATE | T14E8.4   | WBGene00043981 | T14E8.4.1  | protein_coding     | c.881T>A            | p.Val294Glu |
| X     | 6560873 | C   | T   | 0.01 | T      | missense_variant                       | MODERATE | T14E8.4   | WBGene00043981 | T14E8.4.1  | protein_coding     | c.877G>A            | p.Val293Ile |
| X     | 6560876 | T   | C   | 0    | C      | missense_variant                       | MODERATE | T14E8.4   | WBGene00043981 | T14E8.4.1  | protein_coding     | c.874A>G            | p.Lys292Glu |
| X     | 6560955 | C   | T   | 0    | T      | synonymous_variant                     | LOW      | T14E8.4   | WBGene00043981 | T14E8.4.1  | protein_coding     | c.795G>A            | p.Ser265Ser |
| X     | 6561004 | C   | T   | 0.09 | T      | missense_variant                       | MODERATE | T14E8.4   | WBGene00043981 | T14E8.4.1  | protein_coding     | c.746G>A            | p.Arg249Lys |
| X     | 6561012 | G   | T   | 0.07 | T      | synonymous_variant                     | LOW      | T14E8.4   | WBGene00043981 | T14E8.4.1  | protein_coding     | c.738C>A            | p.Ile246Ile |
| X     | 6561013 | A   | T   | 0.01 | T      | missense_variant                       | MODERATE | T14E8.4   | WBGene00043981 | T14E8.4.1  | protein_coding     | c.737T>A            | p.Ile246Asn |
| X     | 6561030 | C   | T   | 0.54 | T      | synonymous_variant                     | LOW      | T14E8.4   | WBGene00043981 | T14E8.4.1  | protein_coding     | c.720G>A            | p.Thr240Thr |
| X     | 6561062 | C   | T   | 0    | T      | missense_variant                       | MODERATE | T14E8.4   | WBGene00043981 | T14E8.4.1  | protein_coding     | c.688G>A            | p.Ala230Thr |
| X     | 6561122 | T   | A   | 0    | A      | missense_variant                       | MODERATE | T14E8.4   | WBGene00043981 | T14E8.4.1  | protein_coding     | c.628A>T            | p.Ile210Phe |
| X     | 6561199 | G   | T   | 0.03 | T      | missense_variant                       | MODERATE | T14E8.4   | WBGene00043981 | T14E8.4.1  | protein_coding     | c.551C>A            | p.Thr184Asn |
| X     | 6561201 | T   | A   | 0.02 | A      | missense_variant                       | MODERATE | T14E8.4   | WBGene00043981 | T14E8.4.1  | protein_coding     | c.549A>T            | p.Leu183Phe |
| X     | 6561212 | A   | G   | 0    | G      | splice_region_variant&intron_variant   | LOW      | T14E8.4   | WBGene00043981 | T14E8.4.1  | protein_coding     | c.544-6T>C          | NA          |
| X     | 6561830 | G   | A   | 0    | A      | synonymous_variant                     | LOW      | T14E8.4   | WBGene00043981 | T14E8.4.1  | protein_coding     | c.403C>T            | p.Leu135Leu |
| X     | 6562016 | G   | C   | 0.01 | C      | missense_variant                       | MODERATE | T14E8.4   | WBGene00043981 | T14E8.4.1  | protein_coding     | c.217C>G            | p.Gln73Glu  |
| X     | 6562145 | A   | T   | 0    | T      | missense_variant                       | MODERATE | T14E8.4   | WBGene00043981 | T14E8.4.1  | protein_coding     | c.138T>A            | p.Asn46Lys  |
| X     | 6562349 | A   | T   | 0    | T      | missense_variant                       | MODERATE | T14E8.4   | WBGene00043981 | T14E8.4.1  | protein_coding     | c.18T>A             | p.Phe6Leu   |
| X     | 6562355 | T   | A   | 0.05 | A      | missense_variant                       | MODERATE | T14E8.4   | WBGene00043981 | T14E8.4.1  | protein_coding     | c.12A>T             | p.Leu4Phe   |
| X     | 6562361 | C   | G   | 0.01 | G      | missense_variant                       | MODERATE | T14E8.4   | WBGene00043981 | T14E8.4.1  | protein_coding     | c.6G>C              | p.Arg2Ser   |

858

859 **Figure S8: List of naturally occurring *aaim-1* variants in wild isolates of *C. elegans*.**

860 This table represents a list of *T14E8.4* coding variants found to naturally occur in wild isolates of

861 *C. elegans* generated by the CeNDR variant browser.<sup>43</sup> The reference allele (REF) as well as the

862 alternate variant (ALT) and the allele frequency (AF) are displayed for various sites (POS) across

863 *T14E8.4*. The nature (effect) and impact of these variants are depicted as well as the nucleotide

864 changes (nt\_change) and the corresponding amino acid change (aa\_change). *T14E8.4* does not

865 possess any variants predicted to have a high impact, implying that there are no obvious loss of

866 function alleles and that its retention in the wild is advantageous.

867

868

869 Supplemental table 1: List of strains utilized in this study

| Strain name            | Genotype                                                                               | Source                               |
|------------------------|----------------------------------------------------------------------------------------|--------------------------------------|
| N2                     | Wild-type , Bristol strain                                                             | Caenorhabditis genetics center (CGC) |
| <i>fawn-1</i> (AWR 05) | <i>aaim-1 (kea89)</i> X C127T , Q43Stop                                                | This study                           |
| <i>fawn-2</i> (AWR 11) | <i>aaim-1 (kea90)</i> X G221A splice site mutation                                     | This study                           |
| <i>fawn-3</i> (AWR 17) | <i>aaim-1 (kea28)</i> X 2.2 kb deletion                                                | This study                           |
| <i>fawn-4</i> (AWR03)  | <i>aaim-1 (kea91)</i> X C1286T, A429V                                                  | This study                           |
| DM7448                 | VC20019 Ex[ <i>Pmyo-3::YFP</i> ]                                                       | Mok et al. (2020) <sup>75</sup>      |
| RB563                  | <i>aaim-1 (ok295)</i> X                                                                | CGC                                  |
| AWR 73                 | <i>aaim-1 (kea22)</i> X                                                                | This study                           |
| AWR 83                 | <i>aaim-1 (kea28)</i> X                                                                | This study                           |
| DA465                  | <i>eat-2 (ad465)</i> II                                                                | CGC                                  |
| AWR 131                | N2Ex[ <i>pmyo2::mCherry::Unc54, paaaim-1::GFP::3xFlag::Unc54</i> ]                     | This study                           |
| AWR 125                | <i>aaim-1 (kea28)</i> Ex[ <i>pmyo2::mCherry::Unc54, paaaim-1::GFP::3xFlag::Unc54</i> ] | This study                           |
| AWR 122                | <i>aaim-1 (kea28)</i> Ex[ <i>pmyo3::mCherry::Unc54, paaaim-1::GFP::Unc54</i> ]         | This study                           |
| AWR 115                | <i>aaim-1 (kea28)</i> Ex[ <i>pmyo2::mCherry::Unc54, paaaim-1::aaim-1::Unc54</i> ]      | This study                           |

|         |                                                                                                       |            |
|---------|-------------------------------------------------------------------------------------------------------|------------|
| AWR119  | <i>aaim-1</i> ( <i>kea28</i> <i>Expmyo2::mCherry::Unc54</i> , <i>paaim-1::aaim-1::3xFlag::Unc54</i> ) | This study |
| AWR 127 | <i>aaim-1</i> ( <i>kea28Expmyo2::mCherry::Unc54</i> , <i>paaim-1::SPΔ aaim-1::3xFlag::Unc54</i> )     | This study |
| AWR129  | <i>aaim-1</i> ( <i>kea28</i> <i>Expmyo2::mCherry::Unc54</i> , <i>pspp-5:: aaim-1::3xFlag::Unc54</i> ) | This study |
| YY1446  | <i>znfx-1</i> ( <i>gg634</i> [ <i>HA::tagRFP::znfx-1</i> ]) II.                                       | CGC        |

870

871

872

873

874

875

876

877

878

879

880

881

882

883

884

885

886 **Supplemental table 2: Spore doses utilized in this study.**

| Species            | Dose      | Plate concentration (spores/cm <sup>2</sup> ) | Total spores on assay plate (Millions)<br>Plate size: *3.5cm, **6cm, ***10cm |
|--------------------|-----------|-----------------------------------------------|------------------------------------------------------------------------------|
| <i>N. parisii</i>  | Very low  | 25,984                                        | 0.25*                                                                        |
|                    | low       | 207,875                                       | 2.0*                                                                         |
|                    | Medium-1  | 1,247,232                                     | 3.0*                                                                         |
|                    | Medium-2  | 115,050                                       | 3.25                                                                         |
|                    | Medium-2  | 41,380                                        | 3.25**                                                                       |
|                    | Medium-3  | 141,600                                       | 4.0                                                                          |
|                    | High      | 194,700                                       | 5.50                                                                         |
|                    | Very high | 318,600                                       | 9.0                                                                          |
|                    | Maximal   | 637,200                                       | 18.0                                                                         |
| <i>N. ausubeli</i> | Medium    | 103,936                                       | 1.0*                                                                         |
|                    | High      | 519,680                                       | 5.0*                                                                         |

887

888

889

890

891

892

893

894

895

896 **Supplemental table 3: Primer sequences.**

| Primer description                                                                                                                                                                          | Sequence                                                                                                                                                         |
|---------------------------------------------------------------------------------------------------------------------------------------------------------------------------------------------|------------------------------------------------------------------------------------------------------------------------------------------------------------------|
| Forward primer to amplify <i>aaim-1</i>                                                                                                                                                     | 5'- atgaggttattattttttcagcat -3'                                                                                                                                 |
| Reverse primer to amplify <i>aaim-1</i>                                                                                                                                                     | 5'-ttaatttttctggtgagg-3'                                                                                                                                         |
| Forward primer to generate <i>SPΔaaim-1</i>                                                                                                                                                 | 5'-atgctaaaggattcttgcctg-3'                                                                                                                                      |
| Forward primer to amplify <i>paaim-1</i>                                                                                                                                                    | 5'-ttagttggaaatgcacaaaaaactgatctct-3'                                                                                                                            |
| Reverse primer to amplify <i>paaim-1</i>                                                                                                                                                    | 5-cagtgacttctgcttataaaatgacttc-3'                                                                                                                                |
| Forward primer to amplify <i>pmyo2</i>                                                                                                                                                      | 5'-cattttatatctgagtagtatccttgccttaaatgtcc-3'                                                                                                                     |
| Reverse primer to amplify <i>pmyo2</i>                                                                                                                                                      | 5'- gcatttctgtgtctgacgat-3'                                                                                                                                      |
| Forward primer to amplify <i>pspp5</i>                                                                                                                                                      | 5'-aaagcaaaatatcattattgggaaaatc-3'                                                                                                                               |
| Reverse primer to amplify <i>pspp5</i>                                                                                                                                                      | 5'-tctgtaataaaataaattgaaatgaaacac-3'                                                                                                                             |
| Forward primer to amplify GFP from pDD282                                                                                                                                                   | 5'-atgagtaaaggagaagaattgttact-3'                                                                                                                                 |
| Reverse primer to amplify GFP from pDD282                                                                                                                                                   | 5'-ttactgtagagctcgtccattccg-3'                                                                                                                                   |
| Forward ultramer to add a Gly Ala Gly Ser <b>linker</b> and <u>3x Flag</u> with <i>stop codon</i> to C-Terminal end of constructs in <b>pDDONR221</b> via round the horn PCR. <sup>67</sup> | 5'-<br><b><u>ggagccggatctgattataaagacgatgacgataagcgtgactacaaggacgacgacgaca</u></b><br><b><u>agcgtgattacaaggatgacgatgacaagagataaacccagcttctgtacaaagttg-3'</u></b> |

897

898 **References:**

- 899
- 900 1. Murareanu Brandon M. *et al.* Generation of a Microsporidia Species Attribute Database and  
901 Analysis of the Extensive Ecological and Phenotypic Diversity of Microsporidia. *mBio* **0**,  
902 e01490-21.
- 903 2. Corradi, N. Microsporidia: Eukaryotic Intracellular Parasites Shaped by Gene Loss and  
904 Horizontal Gene Transfers. *Annu. Rev. Microbiol.* **69**, 167–183 (2015).
- 905 3. Wadi, L. & Reinke, A. W. Evolution of microsporidia: An extremely successful group of  
906 eukaryotic intracellular parasites. *PLoS Pathog.* **16**, e1008276 (2020).
- 907 4. Balla, K. M., Andersen, E. C., Kruglyak, L. & Troemel, E. R. A Wild *C. Elegans* Strain Has  
908 Enhanced Epithelial Immunity to a Natural Microsporidian Parasite. *PLOS Pathog.* **11**,  
909 e1004583 (2015).
- 910 5. Routtu, J. & Ebert, D. Genetic architecture of resistance in *Daphnia* hosts against two species  
911 of host-specific parasites. *Heredity* **114**, 241–248 (2015).
- 912 6. Martín-Hernández, R. *et al.* *Nosema ceranae* in *Apis mellifera*: a 12 years postdetection  
913 perspective. *Environ. Microbiol.* **20**, 1302–1329 (2018).
- 914 7. Jaroenlak, P. *et al.* Identification, characterization and heparin binding capacity of a spore-  
915 wall, virulence protein from the shrimp microsporidian, *Enterocytozoon hepatopenaei*  
916 (EHP). *Parasit. Vectors* **11**, 1–15 (2018).
- 917 8. Stentiford, G. D. *et al.* Microsporidia – Emergent Pathogens in the Global Food Chain.  
918 *Trends Parasitol.* **32**, 336–348 (2016).
- 919 9. Han, B. & Weiss, L. Therapeutic targets for the treatment of microsporidiosis in humans.  
920 *Expert Opin. Ther. Targets* **22**, (2018).



- 921 10. Han, B., Takvorian, P. M. & Weiss, L. M. Invasion of Host Cells by Microsporidia. *Front.*  
922 *Microbiol.* **11**, (2020).
- 923 11. Jarkass, H. T. E. & Reinke, A. W. The ins and outs of host-microsporidia interactions during  
924 invasion, proliferation and exit. *Cell. Microbiol.* **n/a**, e13247.
- 925 12. Hayman, J. R., Hayes, S. F., Amon, J. & Nash, T. E. Developmental Expression of Two  
926 Spore Wall Proteins during Maturation of the Microsporidian *Encephalitozoon intestinalis*.  
927 *Infect. Immun.* **69**, 7057–7066 (2001).
- 928 13. Hayman, J. R., Southern, T. R. & Nash, T. E. Role of Sulfated Glycans in Adherence of the  
929 Microsporidian *Encephalitozoon intestinalis* to Host Cells In Vitro. *Infect. Immun.* **73**, 841–  
930 848 (2005).
- 931 14. Southern, T. R., Jolly, C. E., Lester, M. E. & Hayman, J. R. EnP1, a Microsporidian Spore  
932 Wall Protein That Enables Spores To Adhere to and Infect Host Cells In Vitro. *Eukaryot.*  
933 *Cell* **6**, 1354–1362 (2007).
- 934 15. Li, Y. *et al.* Identification of a novel spore wall protein (SWP26) from microsporidia  
935 *Nosema bombycis*. *Int. J. Parasitol.* **39**, 391–398 (2009).
- 936 16. Wu, Z. *et al.* Proteomic analysis of spore wall proteins and identification of two spore wall  
937 proteins from *Nosema bombycis* (Microsporidia). *Proteomics* **8**, 2447–2461 (2008).
- 938 17. Chen, L., Li, R., You, Y., Zhang, K. & Zhang, L. A Novel Spore Wall Protein from  
939 *Antonospora locustae* (Microsporidia: Nosematidae) Contributes to Sporulation. *J. Eukaryot.*  
940 *Microbiol.* **64**, 779–791 (2017).
- 941 18. Xu, Y., Takvorian, P., Cali, A. & Weiss, L. M. Lectin Binding of the Major Polar Tube  
942 Protein (PTPI) and its Role in Invasion. *J. Eukaryot. Microbiol.* **50**, 600–601 (2003).

- 943 19. Xu, Y., Takvorian, P. M., Cali, A., Orr, G. & Weiss, L. M. Glycosylation of the Major Polar  
944 Tube Protein of *Encephalitozoon hellem*, a Microsporidian Parasite That Infects Humans.  
945 *Infect. Immun.* **72**, 6341–6350 (2004).
- 946 20. Han, B. *et al.* The role of microsporidian polar tube protein 4 (PTP4) in host cell infection.  
947 *PLOS Pathog.* **13**, e1006341 (2017).
- 948 21. Han, B. *et al.* Microsporidia Interact with Host Cell Mitochondria via Voltage-Dependent  
949 Anion Channels Using Sporoplasm Surface Protein 1. *mBio* **10**, (2019).
- 950 22. Luallen, R. J. *et al.* Discovery of a Natural Microsporidian Pathogen with a Broad Tissue  
951 Tropism in *Caenorhabditis elegans*. *PLoS Pathog.* **12**, e1005724 (2016).
- 952 23. Zhang, G. *et al.* A Large Collection of Novel Nematode-Infecting Microsporidia and Their  
953 Diverse Interactions with *Caenorhabditis elegans* and Other Related Nematodes. *PLOS*  
954 *Pathog.* **12**, e1006093 (2016).
- 955 24. Troemel, E. R., Félix, M.-A., Whiteman, N. K., Barrière, A. & Ausubel, F. M. Microsporidia  
956 Are Natural Intracellular Parasites of the Nematode *Caenorhabditis elegans*. *PLoS Biol.* **6**,  
957 e309 (2008).
- 958 25. Troemel, E. R. New Models of Microsporidiosis: Infections in Zebrafish, *C. elegans*, and  
959 Honey Bee. *PLOS Pathog.* **7**, e1001243 (2011).
- 960 26. Balla, K. M., Luallen, R. J., Bakowski, M. A. & Troemel, E. R. Cell-to-cell spread of  
961 microsporidia causes *Caenorhabditis elegans* organs to form syncytia. *Nat. Microbiol.* **1**,  
962 16144 (2016).
- 963 27. Willis, A. R. *et al.* A parental transcriptional response to microsporidia infection induces  
964 inherited immunity in offspring. *Sci. Adv.* **7**, (2021).

- 965 28. Botts, M. R., Cohen, L. B., Probert, C. S., Wu, F. & Troemel, E. R. Microsporidia  
966 Intracellular Development Relies on Myc Interaction Network Transcription Factors in the  
967 Host. *G3 GenesGenomesGenetics* **6**, 2707–2716 (2016).
- 968 29. Szumowski, S. C., Botts, M. R., Popovich, J. J., Smelkinson, M. G. & Troemel, E. R. The  
969 small GTPase RAB-11 directs polarized exocytosis of the intracellular pathogen *N. parisii*  
970 for fecal-oral transmission from *C. elegans*. *Proc. Natl. Acad. Sci.* **111**, 8215–8220 (2014).
- 971 30. Balla, K. M., Lažetić, V. & Troemel, E. R. Natural variation in the roles of *C. elegans*  
972 autophagy components during microsporidia infection. *PLOS ONE* **14**, e0216011 (2019).
- 973 31. Reddy, K. C. *et al.* Antagonistic paralogs control a switch between growth and pathogen  
974 resistance in *C. elegans*. *PLoS Pathog.* **15**, e1007528 (2019).
- 975 32. Tecele, E. *et al.* The purine nucleoside phosphorylase *pnp-1* regulates epithelial cell resistance  
976 to infection in *C. elegans*. *PLOS Pathog.* **17**, e1009350 (2021).
- 977 33. Luallen, R. J., Bakowski, M. A. & Troemel, E. R. Characterization of Microsporidia-Induced  
978 Developmental Arrest and a Transmembrane Leucine-Rich Repeat Protein in *Caenorhabditis*  
979 *elegans*. *PLOS ONE* **10**, e0124065 (2015).
- 980 34. Mok, C. A. *et al.* MIP-MAP: High-Throughput Mapping of *Caenorhabditis elegans*  
981 Temperature-Sensitive Mutants via Molecular Inversion Probes. *Genetics* **207**, 447–463  
982 (2017).
- 983 35. Almagro Armenteros, J. J. *et al.* SignalP 5.0 improves signal peptide predictions using deep  
984 neural networks. *Nat. Biotechnol.* **37**, 420–423 (2019).
- 985 36. Reinke, A. W., Balla, K. M., Bennett, E. J. & Troemel, E. R. Identification of microsporidia  
986 host-exposed proteins reveals a repertoire of rapidly evolving proteins. *Nat. Commun.* **8**,  
987 14023 (2017).

- 988 37. Ghafouri, S. & McGhee, J. D. Bacterial residence time in the intestine of *Caenorhabditis*  
989 *elegans*. *Nematology* **9**, 87–91 (2007).
- 990 38. Engelmann, I. *et al.* A Comprehensive Analysis of Gene Expression Changes Provoked by  
991 Bacterial and Fungal Infection in *C. elegans*. *PLoS ONE* **6**, e19055 (2011).
- 992 39. Head, B. P., Olaitan, A. O. & Aballay, A. Role of GATA transcription factor ELT-2 and p38  
993 MAPK PMK-1 in recovery from acute *P. aeruginosa* infection in *C. elegans*. *Virulence* **8**,  
994 261–274 (2017).
- 995 40. Styer, K. L. *et al.* Innate immunity in *Caenorhabditis elegans* is regulated by neurons  
996 expressing NPR-1/GPCR. *Science* **322**, 460–464 (2008).
- 997 41. Tan, M. W., Mahajan-Miklos, S. & Ausubel, F. M. Killing of *Caenorhabditis elegans* by  
998 *Pseudomonas aeruginosa* used to model mammalian bacterial pathogenesis. *Proc. Natl.*  
999 *Acad. Sci. U. S. A.* **96**, 715–720 (1999).
- 1000 42. Kirienko, N. V., Cezairliyan, B. O., Ausubel, F. M. & Powell, J. R. *Pseudomonas aeruginosa*  
1001 PA14 Pathogenesis in *Caenorhabditis elegans*. in *Pseudomonas Methods and Protocols* (eds.  
1002 Filloux, A. & Ramos, J.-L.) 653–669 (Springer, 2014). doi:10.1007/978-1-4939-0473-0\_50.
- 1003 43. Cook, D. E., Zdraljevic, S., Roberts, J. P. & Andersen, E. C. CeNDR, the *Caenorhabditis*  
1004 *elegans* natural diversity resource. *Nucleic Acids Res.* **45**, D650–D657 (2017).
- 1005 44. Dierking, K., Yang, W. & Schulenburg, H. Antimicrobial effectors in the nematode  
1006 *Caenorhabditis elegans*: an outgroup to the Arthropoda. *Philos. Trans. R. Soc. B Biol. Sci.*  
1007 **371**, 20150299 (2016).
- 1008 45. Suh, J. & Hutter, H. A survey of putative secreted and transmembrane proteins encoded in  
1009 the *C. elegans* genome. *BMC Genomics* **13**, 333 (2012).

- 1010 46. Gallotta, I. *et al.* Extracellular proteostasis prevents aggregation during pathogenic attack.  
1011 *Nature* **584**, 410–414 (2020).
- 1012 47. Strzyz, P. Bend it like glycocalyx. *Nat. Rev. Mol. Cell Biol.* **20**, 388–388 (2019).
- 1013 48. Hoffman, C. L., Lalsiamthara, J. & Aballay, A. Host Mucin Is Exploited by *Pseudomonas*  
1014 *aeruginosa* To Provide Monosaccharides Required for a Successful Infection. *mBio* **11**,  
1015 (2020).
- 1016 49. Steentoft, C. *et al.* Precision mapping of the human O-GalNAc glycoproteome through  
1017 SimpleCell technology. *EMBO J.* **32**, 1478–1488 (2013).
- 1018 50. Jensen, P. H., Kolarich, D. & Packer, N. H. Mucin-type O-glycosylation – putting the pieces  
1019 together. *FEBS J.* **277**, 81–94 (2010).
- 1020 51. Tran, D. T. & Ten Hagen, K. G. Mucin-type O-Glycosylation during Development. *J. Biol.*  
1021 *Chem.* **288**, 6921–6929 (2013).
- 1022 52. Schulenburg, H. & Felix, M.-A. The Natural Biotic Environment of *Caenorhabditis elegans*.  
1023 *Genetics* **206**, 55–86 (2017).
- 1024 53. Samuel, B. S., Rowedder, H., Braendle, C., Félix, M.-A. & Ruvkun, G. *Caenorhabditis*  
1025 *elegans* responses to bacteria from its natural habitats. *Proc. Natl. Acad. Sci.* **113**, E3941–  
1026 E3949 (2016).
- 1027 54. Sinha, A., Rae, R., Iatsenko, I. & Sommer, R. J. System Wide Analysis of the Evolution of  
1028 Innate Immunity in the Nematode Model Species *Caenorhabditis elegans* and *Pristionchus*  
1029 *pacificus*. *PLOS ONE* **7**, e44255 (2012).
- 1030 55. Ashe, A. *et al.* A deletion polymorphism in the *Caenorhabditis elegans* RIG-I homolog  
1031 disables viral RNA dicing and antiviral immunity. *eLife* **2**, e00994 (2013).

- 1032 56. Reddy, K. C. *et al.* An Intracellular Pathogen Response Pathway Promotes Proteostasis in  
1033 *C. elegans*. *Curr. Biol. CB* **27**, 3544–3553.e5 (2017).
- 1034 57. Toor, J. & Best, A. Evolution of Host Defense against Multiple Enemy Populations. *Am. Nat.*  
1035 **187**, 308–319 (2016).
- 1036 58. Thaler, J. S., Fidantsef, A. L., Duffey, S. S. & Bostock, R. M. Trade-Offs in Plant Defense  
1037 Against Pathogens and Herbivores: A Field Demonstration of Chemical Elicitors of Induced  
1038 Resistance. *J. Chem. Ecol.* **25**, 1597–1609 (1999).
- 1039 59. Thompson, O. *et al.* The million mutation project: a new approach to genetics in  
1040 *Caenorhabditis elegans*. *Genome Res.* **23**, 1749–1762 (2013).
- 1041 60. Bolger, A. M., Lohse, M. & Usadel, B. Trimmomatic: a flexible trimmer for Illumina  
1042 sequence data. *Bioinforma. Oxf. Engl.* **30**, 2114–2120 (2014).
- 1043 61. Li, H. & Durbin, R. Fast and accurate short read alignment with Burrows-Wheeler transform.  
1044 *Bioinforma. Oxf. Engl.* **25**, 1754–1760 (2009).
- 1045 62. DePristo, M. A. *et al.* A framework for variation discovery and genotyping using next-  
1046 generation DNA sequencing data. *Nat. Genet.* **43**, 491–498 (2011).
- 1047 63. Wang, K., Li, M. & Hakonarson, H. ANNOVAR: functional annotation of genetic variants  
1048 from high-throughput sequencing data. *Nucleic Acids Res.* **38**, e164 (2010).
- 1049 64. Schindelin, J. *et al.* Fiji: an open-source platform for biological-image analysis. *Nat. Methods*  
1050 **9**, 676–682 (2012).
- 1051 65. Walhout, A. J. *et al.* GATEWAY recombinational cloning: application to the cloning of large  
1052 numbers of open reading frames or ORFeomes. *Methods Enzymol.* **328**, 575–592 (2000).
- 1053 66. Hartley, J. L., Temple, G. F. & Brasch, M. A. DNA cloning using in vitro site-specific  
1054 recombination. *Genome Res.* **10**, 1788–1795 (2000).

- 1055 67. Moore, S. D. & Prevelige, P. E. A P22 scaffold protein mutation increases the robustness of  
1056 head assembly in the presence of excess portal protein. *J. Virol.* **76**, 10245–10255 (2002).
- 1057 68. Almagro Armenteros, J. J. *et al.* SignalP 5.0 improves signal peptide predictions using deep  
1058 neural networks. *Nat. Biotechnol.* **37**, 420–423 (2019).
- 1059 69. Dokshin, G. A., Ghanta, K. S., Piscopo, K. M. & Mello, C. C. Robust Genome Editing with  
1060 Short Single-Stranded and Long, Partially Single-Stranded DNA Donors in *Caenorhabditis*  
1061 *elegans*. *Genetics* **210**, 781–787 (2018).
- 1062 70. Concordet, J.-P. & Haeussler, M. CRISPOR: intuitive guide selection for CRISPR/Cas9  
1063 genome editing experiments and screens. *Nucleic Acids Res.* **46**, W242–W245 (2018).
- 1064 71. Amrit, F. R. G., Ratnappan, R., Keith, S. A. & Ghazi, A. The *C. elegans* lifespan assay  
1065 toolkit. *Methods* **68**, 465–475 (2014).
- 1066 72. Crittenden, S. & Kimble, J. Preparation and Immunolabeling of *Caenorhabditis elegans*.  
1067 *Cold Spring Harb. Protoc.* **2009**, pdb.prot5216-pdb.prot5216 (2009).
- 1068 73. Wan, G. *et al.* Spatiotemporal regulation of liquid-like condensates in epigenetic inheritance.  
1069 *Nature* **557**, 679–683 (2018).
- 1070 74. Large-Scale Screening for Targeted Knockouts in the *Caenorhabditis elegans* Genome. *G3*  
1071 *GenesGenomesGenetics* **2**, 1415–1425 (2012).
- 1072 75. Mok, C., Belmarez, G., Edgley, M. L., Moerman, D. G. & Waterston, R. H. PhenoMIP:  
1073 High-Throughput Phenotyping of Diverse *Caenorhabditis elegans* Populations via Molecular  
1074 Inversion Probes. *G3 GenesGenomesGenetics* **10**, 3977–3990 (2020).
- 1075
